# Supplementary material for: Genome-Wide Comparative Analysis of Chemosensory Gene Families in Five Tsetse Fly Species
Source: PubMed Central journal article supplement (PMC4757090; doi:10.1371/journal.pntd.0004421), 2016-02-17

|           | D* |    |    |     |    |    |    |    |    |    | R* |    |   |   |   |   |   |   |   |   | R* |   |   |   |   |   |   |   |   |   | D and/or E* |   |   |   |   |   |   |   |   |   |   |   |   |   |   |   |   |   |   |   |   |   |   |   |   |   |   |   |   |   |   |   |   |   |   |   |   |   |   |   |   |   |   |   |   |   |   |     |   |   |   |   |   |   |   |   |   |   |   |   |   |   |   |   |   |   |   |
|-----------|----|----|----|-----|----|----|----|----|----|----|----|----|---|---|---|---|---|---|---|---|----|---|---|---|---|---|---|---|---|---|-------------|---|---|---|---|---|---|---|---|---|---|---|---|---|---|---|---|---|---|---|---|---|---|---|---|---|---|---|---|---|---|---|---|---|---|---|---|---|---|---|---|---|---|---|---|---|---|-----|---|---|---|---|---|---|---|---|---|---|---|---|---|---|---|---|---|---|---|
| Aglr40a   | GA | LG | LM | LR  | EL | YD | LV | AV | WT | ER | MK | AV | E | F | S | F | S | A | F | V | T  | H | A | P | R | L | E | L | A | L | R           | P | F | K | D | V | P | K | F | L | T | I | V | Y | W | I | A | T | V | L | A | D | V | V | S | A | Q | L | T | S | Q | F | A | R | P | A | R | E | P | P | I | E | G | I | R | V | L | ... | A | D | Y | A | V | F | G | G | R | E | T | L | F | N | T | K | E | A | G |
| Dmlr40a   | GA | IG | LL | ... |    |    |    |    |    |    |    |    |   |   |   |   |   |   |   |   |    |   |   |   |   |   |   |   |   |   |             |   |   |   |   |   |   |   |   |   |   |   |   |   |   |   |   |   |   |   |   |   |   |   |   |   |   |   |   |   |   |   |   |   |   |   |   |   |   |   |   |   |   |   |   |   |   |     |   |   |   |   |   |   |   |   |   |   |   |   |   |   |   |   |   |   |   |
| Mdlr40a   | GG | I  | GL | ... |    |    |    |    |    |    |    |    |   |   |   |   |   |   |   |   |    |   |   |   |   |   |   |   |   |   |             |   |   |   |   |   |   |   |   |   |   |   |   |   |   |   |   |   |   |   |   |   |   |   |   |   |   |   |   |   |   |   |   |   |   |   |   |   |   |   |   |   |   |   |   |   |   |     |   |   |   |   |   |   |   |   |   |   |   |   |   |   |   |   |   |   |   |
| Gblr40a   | GG | I  | GL | ... |    |    |    |    |    |    |    |    |   |   |   |   |   |   |   |   |    |   |   |   |   |   |   |   |   |   |             |   |   |   |   |   |   |   |   |   |   |   |   |   |   |   |   |   |   |   |   |   |   |   |   |   |   |   |   |   |   |   |   |   |   |   |   |   |   |   |   |   |   |   |   |   |   |     |   |   |   |   |   |   |   |   |   |   |   |   |   |   |   |   |   |   |   |
| Gflr40a   | GG | I  | GL | ... |    |    |    |    |    |    |    |    |   |   |   |   |   |   |   |   |    |   |   |   |   |   |   |   |   |   |             |   |   |   |   |   |   |   |   |   |   |   |   |   |   |   |   |   |   |   |   |   |   |   |   |   |   |   |   |   |   |   |   |   |   |   |   |   |   |   |   |   |   |   |   |   |   |     |   |   |   |   |   |   |   |   |   |   |   |   |   |   |   |   |   |   |   |
| Galr40a   | GG | I  | GL | ... |    |    |    |    |    |    |    |    |   |   |   |   |   |   |   |   |    |   |   |   |   |   |   |   |   |   |             |   |   |   |   |   |   |   |   |   |   |   |   |   |   |   |   |   |   |   |   |   |   |   |   |   |   |   |   |   |   |   |   |   |   |   |   |   |   |   |   |   |   |   |   |   |   |     |   |   |   |   |   |   |   |   |   |   |   |   |   |   |   |   |   |   |   |
| Gpdlr40a  | GG | I  | GL | ... |    |    |    |    |    |    |    |    |   |   |   |   |   |   |   |   |    |   |   |   |   |   |   |   |   |   |             |   |   |   |   |   |   |   |   |   |   |   |   |   |   |   |   |   |   |   |   |   |   |   |   |   |   |   |   |   |   |   |   |   |   |   |   |   |   |   |   |   |   |   |   |   |   |     |   |   |   |   |   |   |   |   |   |   |   |   |   |   |   |   |   |   |   |
| Gmm1r40a  | GG | I  | GL | ... |    |    |    |    |    |    |    |    |   |   |   |   |   |   |   |   |    |   |   |   |   |   |   |   |   |   |             |   |   |   |   |   |   |   |   |   |   |   |   |   |   |   |   |   |   |   |   |   |   |   |   |   |   |   |   |   |   |   |   |   |   |   |   |   |   |   |   |   |   |   |   |   |   |     |   |   |   |   |   |   |   |   |   |   |   |   |   |   |   |   |   |   |   |
| Aglr75g   | LI | I  | N  | ... |    |    |    |    |    |    |    |    |   |   |   |   |   |   |   |   |    |   |   |   |   |   |   |   |   |   |             |   |   |   |   |   |   |   |   |   |   |   |   |   |   |   |   |   |   |   |   |   |   |   |   |   |   |   |   |   |   |   |   |   |   |   |   |   |   |   |   |   |   |   |   |   |   |     |   |   |   |   |   |   |   |   |   |   |   |   |   |   |   |   |   |   |   |
| Dmlr75b   | GM | I  | DL | ... |    |    |    |    |    |    |    |    |   |   |   |   |   |   |   |   |    |   |   |   |   |   |   |   |   |   |             |   |   |   |   |   |   |   |   |   |   |   |   |   |   |   |   |   |   |   |   |   |   |   |   |   |   |   |   |   |   |   |   |   |   |   |   |   |   |   |   |   |   |   |   |   |   |     |   |   |   |   |   |   |   |   |   |   |   |   |   |   |   |   |   |   |   |
| Dmlr75c   | GA | I  | G  | ... |    |    |    |    |    |    |    |    |   |   |   |   |   |   |   |   |    |   |   |   |   |   |   |   |   |   |             |   |   |   |   |   |   |   |   |   |   |   |   |   |   |   |   |   |   |   |   |   |   |   |   |   |   |   |   |   |   |   |   |   |   |   |   |   |   |   |   |   |   |   |   |   |   |     |   |   |   |   |   |   |   |   |   |   |   |   |   |   |   |   |   |   |   |
| Dmlr75a   | GS | V  | GA | ... |    |    |    |    |    |    |    |    |   |   |   |   |   |   |   |   |    |   |   |   |   |   |   |   |   |   |             |   |   |   |   |   |   |   |   |   |   |   |   |   |   |   |   |   |   |   |   |   |   |   |   |   |   |   |   |   |   |   |   |   |   |   |   |   |   |   |   |   |   |   |   |   |   |     |   |   |   |   |   |   |   |   |   |   |   |   |   |   |   |   |   |   |   |
| Mdlr75b   | G  | V  | V  | ... |    |    |    |    |    |    |    |    |   |   |   |   |   |   |   |   |    |   |   |   |   |   |   |   |   |   |             |   |   |   |   |   |   |   |   |   |   |   |   |   |   |   |   |   |   |   |   |   |   |   |   |   |   |   |   |   |   |   |   |   |   |   |   |   |   |   |   |   |   |   |   |   |   |     |   |   |   |   |   |   |   |   |   |   |   |   |   |   |   |   |   |   |   |
| Mdlr75a   | G  | I  | V  | ... |    |    |    |    |    |    |    |    |   |   |   |   |   |   |   |   |    |   |   |   |   |   |   |   |   |   |             |   |   |   |   |   |   |   |   |   |   |   |   |   |   |   |   |   |   |   |   |   |   |   |   |   |   |   |   |   |   |   |   |   |   |   |   |   |   |   |   |   |   |   |   |   |   |     |   |   |   |   |   |   |   |   |   |   |   |   |   |   |   |   |   |   |   |
| Gblr75a   | GC | I  | G  | ... |    |    |    |    |    |    |    |    |   |   |   |   |   |   |   |   |    |   |   |   |   |   |   |   |   |   |             |   |   |   |   |   |   |   |   |   |   |   |   |   |   |   |   |   |   |   |   |   |   |   |   |   |   |   |   |   |   |   |   |   |   |   |   |   |   |   |   |   |   |   |   |   |   |     |   |   |   |   |   |   |   |   |   |   |   |   |   |   |   |   |   |   |   |
| Gflr75c   | GC | I  | G  | ... |    |    |    |    |    |    |    |    |   |   |   |   |   |   |   |   |    |   |   |   |   |   |   |   |   |   |             |   |   |   |   |   |   |   |   |   |   |   |   |   |   |   |   |   |   |   |   |   |   |   |   |   |   |   |   |   |   |   |   |   |   |   |   |   |   |   |   |   |   |   |   |   |   |     |   |   |   |   |   |   |   |   |   |   |   |   |   |   |   |   |   |   |   |
| Gblr75c   | GC | I  | G  | ... |    |    |    |    |    |    |    |    |   |   |   |   |   |   |   |   |    |   |   |   |   |   |   |   |   |   |             |   |   |   |   |   |   |   |   |   |   |   |   |   |   |   |   |   |   |   |   |   |   |   |   |   |   |   |   |   |   |   |   |   |   |   |   |   |   |   |   |   |   |   |   |   |   |     |   |   |   |   |   |   |   |   |   |   |   |   |   |   |   |   |   |   |   |
| Galr75a2  | GC | I  | G  | ... |    |    |    |    |    |    |    |    |   |   |   |   |   |   |   |   |    |   |   |   |   |   |   |   |   |   |             |   |   |   |   |   |   |   |   |   |   |   |   |   |   |   |   |   |   |   |   |   |   |   |   |   |   |   |   |   |   |   |   |   |   |   |   |   |   |   |   |   |   |   |   |   |   |     |   |   |   |   |   |   |   |   |   |   |   |   |   |   |   |   |   |   |   |
| Gmm1r75c  | GC | I  | G  | ... |    |    |    |    |    |    |    |    |   |   |   |   |   |   |   |   |    |   |   |   |   |   |   |   |   |   |             |   |   |   |   |   |   |   |   |   |   |   |   |   |   |   |   |   |   |   |   |   |   |   |   |   |   |   |   |   |   |   |   |   |   |   |   |   |   |   |   |   |   |   |   |   |   |     |   |   |   |   |   |   |   |   |   |   |   |   |   |   |   |   |   |   |   |
| Gpdlr75a  | GC | I  | G  | ... |    |    |    |    |    |    |    |    |   |   |   |   |   |   |   |   |    |   |   |   |   |   |   |   |   |   |             |   |   |   |   |   |   |   |   |   |   |   |   |   |   |   |   |   |   |   |   |   |   |   |   |   |   |   |   |   |   |   |   |   |   |   |   |   |   |   |   |   |   |   |   |   |   |     |   |   |   |   |   |   |   |   |   |   |   |   |   |   |   |   |   |   |   |
| Gpdlr75c  | GC | I  | G  | ... |    |    |    |    |    |    |    |    |   |   |   |   |   |   |   |   |    |   |   |   |   |   |   |   |   |   |             |   |   |   |   |   |   |   |   |   |   |   |   |   |   |   |   |   |   |   |   |   |   |   |   |   |   |   |   |   |   |   |   |   |   |   |   |   |   |   |   |   |   |   |   |   |   |     |   |   |   |   |   |   |   |   |   |   |   |   |   |   |   |   |   |   |   |
| Gmm1r75a  | G  | V  | V  | ... |    |    |    |    |    |    |    |    |   |   |   |   |   |   |   |   |    |   |   |   |   |   |   |   |   |   |             |   |   |   |   |   |   |   |   |   |   |   |   |   |   |   |   |   |   |   |   |   |   |   |   |   |   |   |   |   |   |   |   |   |   |   |   |   |   |   |   |   |   |   |   |   |   |     |   |   |   |   |   |   |   |   |   |   |   |   |   |   |   |   |   |   |   |
| Gflr75a   | GA | I  | G  | ... |    |    |    |    |    |    |    |    |   |   |   |   |   |   |   |   |    |   |   |   |   |   |   |   |   |   |             |   |   |   |   |   |   |   |   |   |   |   |   |   |   |   |   |   |   |   |   |   |   |   |   |   |   |   |   |   |   |   |   |   |   |   |   |   |   |   |   |   |   |   |   |   |   |     |   |   |   |   |   |   |   |   |   |   |   |   |   |   |   |   |   |   |   |
| Galr75a1  | GA | I  | G  | ... |    |    |    |    |    |    |    |    |   |   |   |   |   |   |   |   |    |   |   |   |   |   |   |   |   |   |             |   |   |   |   |   |   |   |   |   |   |   |   |   |   |   |   |   |   |   |   |   |   |   |   |   |   |   |   |   |   |   |   |   |   |   |   |   |   |   |   |   |   |   |   |   |   |     |   |   |   |   |   |   |   |   |   |   |   |   |   |   |   |   |   |   |   |
| Aglr31a   | GL | L  | G  | ... |    |    |    |    |    |    |    |    |   |   |   |   |   |   |   |   |    |   |   |   |   |   |   |   |   |   |             |   |   |   |   |   |   |   |   |   |   |   |   |   |   |   |   |   |   |   |   |   |   |   |   |   |   |   |   |   |   |   |   |   |   |   |   |   |   |   |   |   |   |   |   |   |   |     |   |   |   |   |   |   |   |   |   |   |   |   |   |   |   |   |   |   |   |
| Dmlr31a   | GL | L  | G  | ... |    |    |    |    |    |    |    |    |   |   |   |   |   |   |   |   |    |   |   |   |   |   |   |   |   |   |             |   |   |   |   |   |   |   |   |   |   |   |   |   |   |   |   |   |   |   |   |   |   |   |   |   |   |   |   |   |   |   |   |   |   |   |   |   |   |   |   |   |   |   |   |   |   |     |   |   |   |   |   |   |   |   |   |   |   |   |   |   |   |   |   |   |   |
| Mdlr31a   | G  | I  | G  | ... |    |    |    |    |    |    |    |    |   |   |   |   |   |   |   |   |    |   |   |   |   |   |   |   |   |   |             |   |   |   |   |   |   |   |   |   |   |   |   |   |   |   |   |   |   |   |   |   |   |   |   |   |   |   |   |   |   |   |   |   |   |   |   |   |   |   |   |   |   |   |   |   |   |     |   |   |   |   |   |   |   |   |   |   |   |   |   |   |   |   |   |   |   |
| Gpdlr31a  | G  | F  | L  | ... |    |    |    |    |    |    |    |    |   |   |   |   |   |   |   |   |    |   |   |   |   |   |   |   |   |   |             |   |   |   |   |   |   |   |   |   |   |   |   |   |   |   |   |   |   |   |   |   |   |   |   |   |   |   |   |   |   |   |   |   |   |   |   |   |   |   |   |   |   |   |   |   |   |     |   |   |   |   |   |   |   |   |   |   |   |   |   |   |   |   |   |   |   |
| Gflr31a   | G  | F  | L  | ... |    |    |    |    |    |    |    |    |   |   |   |   |   |   |   |   |    |   |   |   |   |   |   |   |   |   |             |   |   |   |   |   |   |   |   |   |   |   |   |   |   |   |   |   |   |   |   |   |   |   |   |   |   |   |   |   |   |   |   |   |   |   |   |   |   |   |   |   |   |   |   |   |   |     |   |   |   |   |   |   |   |   |   |   |   |   |   |   |   |   |   |   |   |
| Galr31a   | G  | F  | L  | ... |    |    |    |    |    |    |    |    |   |   |   |   |   |   |   |   |    |   |   |   |   |   |   |   |   |   |             |   |   |   |   |   |   |   |   |   |   |   |   |   |   |   |   |   |   |   |   |   |   |   |   |   |   |   |   |   |   |   |   |   |   |   |   |   |   |   |   |   |   |   |   |   |   |     |   |   |   |   |   |   |   |   |   |   |   |   |   |   |   |   |   |   |   |
| Gmm1r31a  | G  | F  | L  | ... |    |    |    |    |    |    |    |    |   |   |   |   |   |   |   |   |    |   |   |   |   |   |   |   |   |   |             |   |   |   |   |   |   |   |   |   |   |   |   |   |   |   |   |   |   |   |   |   |   |   |   |   |   |   |   |   |   |   |   |   |   |   |   |   |   |   |   |   |   |   |   |   |   |     |   |   |   |   |   |   |   |   |   |   |   |   |   |   |   |   |   |   |   |
| Aglr75h.1 | G  | V  | V  | ... |    |    |    |    |    |    |    |    |   |   |   |   |   |   |   |   |    |   |   |   |   |   |   |   |   |   |             |   |   |   |   |   |   |   |   |   |   |   |   |   |   |   |   |   |   |   |   |   |   |   |   |   |   |   |   |   |   |   |   |   |   |   |   |   |   |   |   |   |   |   |   |   |   |     |   |   |   |   |   |   |   |   |   |   |   |   |   |   |   |   |   |   |   |
| Aglr75h.2 | G  | V  | V  | ... |    |    |    |    |    |    |    |    |   |   |   |   |   |   |   |   |    |   |   |   |   |   |   |   |   |   |             |   |   |   |   |   |   |   |   |   |   |   |   |   |   |   |   |   |   |   |   |   |   |   |   |   |   |   |   |   |   |   |   |   |   |   |   |   |   |   |   |   |   |   |   |   |   |     |   |   |   |   |   |   |   |   |   |   |   |   |   |   |   |   |   |   |   |
| Aglr75k   | GM | I  | G  | ... |    |    |    |    |    |    |    |    |   |   |   |   |   |   |   |   |    |   |   |   |   |   |   |   |   |   |             |   |   |   |   |   |   |   |   |   |   |   |   |   |   |   |   |   |   |   |   |   |   |   |   |   |   |   |   |   |   |   |   |   |   |   |   |   |   |   |   |   |   |   |   |   |   |     |   |   |   |   |   |   |   |   |   |   |   |   |   |   |   |   |   |   |   |
| Aglr75l   | GM | I  | G  | ... |    |    |    |    |    |    |    |    |   |   |   |   |   |   |   |   |    |   |   |   |   |   |   |   |   |   |             |   |   |   |   |   |   |   |   |   |   |   |   |   |   |   |   |   |   |   |   |   |   |   |   |   |   |   |   |   |   |   |   |   |   |   |   |   |   |   |   |   |   |   |   |   |   |     |   |   |   |   |   |   |   |   |   |   |   |   |   |   |   |   |   |   |   |
| Aglr75d   | G  | V  | M  | ... |    |    |    |    |    |    |    |    |   |   |   |   |   |   |   |   |    |   |   |   |   |   |   |   |   |   |             |   |   |   |   |   |   |   |   |   |   |   |   |   |   |   |   |   |   |   |   |   |   |   |   |   |   |   |   |   |   |   |   |   |   |   |   |   |   |   |   |   |   |   |   |   |   |     |   |   |   |   |   |   |   |   |   |   |   |   |   |   |   |   |   |   |   |
| Dmlr75d   | GL | M  | G  | ... |    |    |    |    |    |    |    |    |   |   |   |   |   |   |   |   |    |   |   |   |   |   |   |   |   |   |             |   |   |   |   |   |   |   |   |   |   |   |   |   |   |   |   |   |   |   |   |   |   |   |   |   |   |   |   |   |   |   |   |   |   |   |   |   |   |   |   |   |   |   |   |   |   |     |   |   |   |   |   |   |   |   |   |   |   |   |   |   |   |   |   |   |   |
| Mdlr75d   | G  | F  | M  | ... |    |    |    |    |    |    |    |    |   |   |   |   |   |   |   |   |    |   |   |   |   |   |   |   |   |   |             |   |   |   |   |   |   |   |   |   |   |   |   |   |   |   |   |   |   |   |   |   |   |   |   |   |   |   |   |   |   |   |   |   |   |   |   |   |   |   |   |   |   |   |   |   |   |     |   |   |   |   |   |   |   |   |   |   |   |   |   |   |   |   |   |   |   |
| Gblr75d   | GL | M  | G  | ... |    |    |    |    |    |    |    |    |   |   |   |   |   |   |   |   |    |   |   |   |   |   |   |   |   |   |             |   |   |   |   |   |   |   |   |   |   |   |   |   |   |   |   |   |   |   |   |   |   |   |   |   |   |   |   |   |   |   |   |   |   |   |   |   |   |   |   |   |   |   |   |   |   |     |   |   |   |   |   |   |   |   |   |   |   |   |   |   |   |   |   |   |   |
| Galr75d   | GL | M  | G  | ... |    |    |    |    |    |    |    |    |   |   |   |   |   |   |   |   |    |   |   |   |   |   |   |   |   |   |             |   |   |   |   |   |   |   |   |   |   |   |   |   |   |   |   |   |   |   |   |   |   |   |   |   |   |   |   |   |   |   |   |   |   |   |   |   |   |   |   |   |   |   |   |   |   |     |   |   |   |   |   |   |   |   |   |   |   |   |   |   |   |   |   |   |   |
| Gpdlr75d  | GL | M  | G  | ... |    |    |    |    |    |    |    |    |   |   |   |   |   |   |   |   |    |   |   |   |   |   |   |   |   |   |             |   |   |   |   |   |   |   |   |   |   |   |   |   |   |   |   |   |   |   |   |   |   |   |   |   |   |   |   |   |   |   |   |   |   |   |   |   |   |   |   |   |   |   |   |   |   |     |   |   |   |   |   |   |   |   |   |   |   |   |   |   |   |   |   |   |   |
| Gmm1r75d  | GL | M  | G  | ... |    |    |    |    |    |    |    |    |   |   |   |   |   |   |   |   |    |   |   |   |   |   |   |   |   |   |             |   |   |   |   |   |   |   |   |   |   |   |   |   |   |   |   |   |   |   |   |   |   |   |   |   |   |   |   |   |   |   |   |   |   |   |   |   |   |   |   |   |   |   |   |   |   |     |   |   |   |   |   |   |   |   |   |   |   |   |   |   |   |   |   |   |   |
| Aglr64a   | GM | I  | G  | ... |    |    |    |    |    |    |    |    |   |   |   |   |   |   |   |   |    |   |   |   |   |   |   |   |   |   |             |   |   |   |   |   |   |   |   |   |   |   |   |   |   |   |   |   |   |   |   |   |   |   |   |   |   |   |   |   |   |   |   |   |   |   |   |   |   |   |   |   |   |   |   |   |   |     |   |   |   |   |   |   |   |   |   |   |   |   |   |   |   |   |   |   |   |
| Dmlr64a   | GM | I  | G  | ... |    |    |    |    |    |    |    |    |   |   |   |   |   |   |   |   |    |   |   |   |   |   |   |   |   |   |             |   |   |   |   |   |   |   |   |   |   |   |   |   |   |   |   |   |   |   |   |   |   |   |   |   |   |   |   |   |   |   |   |   |   |   |   |   |   |   |   |   |   |   |   |   |   |     |   |   |   |   |   |   |   |   |   |   |   |   |   |   |   |   |   |   |   |
| Mdlr64a   | GM | I  | G  | ... |    |    |    |    |    |    |    |    |   |   |   |   |   |   |   |   |    |   |   |   |   |   |   |   |   |   |             |   |   |   |   |   |   |   |   |   |   |   |   |   |   |   |   |   |   |   |   |   |   |   |   |   |   |   |   |   |   |   |   |   |   |   |   |   |   |   |   |   |   |   |   |   |   |     |   |   |   |   |   |   |   |   |   |   |   |   |   |   |   |   |   |   |   |
| Gblr64a   | GM | I  | G  | ... |    |    |    |    |    |    |    |    |   |   |   |   |   |   |   |   |    |   |   |   |   |   |   |   |   |   |             |   |   |   |   |   |   |   |   |   |   |   |   |   |   |   |   |   |   |   |   |   |   |   |   |   |   |   |   |   |   |   |   |   |   |   |   |   |   |   |   |   |   |   |   |   |   |     |   |   |   |   |   |   |   |   |   |   |   |   |   |   |   |   |   |   |   |
| Gpdlr64a  | GM | I  | G  | ... |    |    |    |    |    |    |    |    |   |   |   |   |   |   |   |   |    |   |   |   |   |   |   |   |   |   |             |   |   |   |   |   |   |   |   |   |   |   |   |   |   |   |   |   |   |   |   |   |   |   |   |   |   |   |   |   |   |   |   |   |   |   |   |   |   |   |   |   |   |   |   |   |   |     |   |   |   |   |   |   |   |   |   |   |   |   |   |   |   |   |   |   |   |
| Gflr64a   | GM | I  | G  | ... |    |    |    |    |    |    |    |    |   |   |   |   |   |   |   |   |    |   |   |   |   |   |   |   |   |   |             |   |   |   |   |   |   |   |   |   |   |   |   |   |   |   |   |   |   |   |   |   |   |   |   |   |   |   |   |   |   |   |   |   |   |   |   |   |   |   |   |   |   |   |   |   |   |     |   |   |   |   |   |   |   |   |   |   |   |   |   |   |   |   |   |   |   |
| Gmm1r64a  | GM | I  | G  | ... |    |    |    |    |    |    |    |    |   |   |   |   |   |   |   |   |    |   |   |   |   |   |   |   |   |   |             |   |   |   |   |   |   |   |   |   |   |   |   |   |   |   |   |   |   |   |   |   |   |   |   |   |   |   |   |   |   |   |   |   |   |   |   |   |   |   |   |   |   |   |   |   |   |     |   |   |   |   |   |   |   |   |   |   |   |   |   |   |   |   |   |   |   |
| Galr64a   | GM | I  | G  | ... |    |    |    |    |    |    |    |    |   |   |   |   |   |   |   |   |    |   |   |   |   |   |   |   |   |   |             |   |   |   |   |   |   |   |   |   |   |   |   |   |   |   |   |   |   |   |   |   |   |   |   |   |   |   |   |   |   |   |   |   |   |   |   |   |   |   |   |   |   |   |   |   |   |     |   |   |   |   |   |   |   |   |   |   |   |   |   |   |   |   |   |   |   |
| Dmlr84a   | G  | V  | M  | ... |    |    |    |    |    |    |    |    |   |   |   |   |   |   |   |   |    |   |   |   |   |   |   |   |   |   |             |   |   |   |   |   |   |   |   |   |   |   |   |   |   |   |   |   |   |   |   |   |   |   |   |   |   |   |   |   |   |   |   |   |   |   |   |   |   |   |   |   |   |   |   |   |   |     |   |   |   |   |   |   |   |   |   |   |   |   |   |   |   |   |   |   |   |
| Gblr84a   | G  | V  | I  | ... |    |    |    |    |    |    |    |    |   |   |   |   |   |   |   |   |    |   |   |   |   |   |   |   |   |   |             |   |   |   |   |   |   |   |   |   |   |   |   |   |   |   |   |   |   |   |   |   |   |   |   |   |   |   |   |   |   |   |   |   |   |   |   |   |   |   |   |   |   |   |   |   |   |     |   |   |   |   |   |   |   |   |   |   |   |   |   |   |   |   |   |   |   |
| Gflr84a   | G  | V  | I  | ... |    |    |    |    |    |    |    |    |   |   |   |   |   |   |   |   |    |   |   |   |   |   |   |   |   |   |             |   |   |   |   |   |   |   |   |   |   |   |   |   |   |   |   |   |   |   |   |   |   |   |   |   |   |   |   |   |   |   |   |   |   |   |   |   |   |   |   |   |   |   |   |   |   |     |   |   |   |   |   |   |   |   |   |   |   |   |   |   |   |   |   |   |   |
| Galr84a   | G  | V  | I  | ... |    |    |    |    |    |    |    |    |   |   |   |   |   |   |   |   |    |   |   |   |   |   |   |   |   |   |             |   |   |   |   |   |   |   |   |   |   |   |   |   |   |   |   |   |   |   |   |   |   |   |   |   |   |   |   |   |   |   |   |   |   |   |   |   |   |   |   |   |   |   |   |   |   |     |   |   |   |   |   |   |   |   |   |   |   |   |   |   |   |   |   |   |   |
| Gpdlr84a  | G  | V  | I  | ... |    |    |    |    |    |    |    |    |   |   |   |   |   |   |   |   |    |   |   |   |   |   |   |   |   |   |             |   |   |   |   |   |   |   |   |   |   |   |   |   |   |   |   |   |   |   |   |   |   |   |   |   |   |   |   |   |   |   |   |   |   |   |   |   |   |   |   |   |   |   |   |   |   |     |   |   |   |   |   |   |   |   |   |   |   |   |   |   |   |   |   |   |   |
| Gmm1r84a  | G  | V  | I  | ... |    |    |    |    |    |    |    |    |   |   |   |   |   |   |   |   |    |   |   |   |   |   |   |   |   |   |             |   |   |   |   |   |   |   |   |   |   |   |   |   |   |   |   |   |   |   |   |   |   |   |   |   |   |   |   |   |   |   |   |   |   |   |   |   |   |   |   |   |   |   |   |   |   |     |   |   |   |   |   |   |   |   |   |   |   |   |   |   |   |   |   |   |   |
| Mdlr84a1  | G  | V  | I  | ... |    |    |    |    |    |    |    |    |   |   |   |   |   |   |   |   |    |   |   |   |   |   |   |   |   |   |             |   |   |   |   |   |   |   |   |   |   |   |   |   |   |   |   |   |   |   |   |   |   |   |   |   |   |   |   |   |   |   |   |   |   |   |   |   |   |   |   |   |   |   |   |   |   |     |   |   |   |   |   |   |   |   |   |   |   |   |   |   |   |   |   |   |   |
| Mdlr84a2  | G  | V  | I  | ... |    |    |    |    |    |    |    |    |   |   |   |   |   |   |   |   |    |   |   |   |   |   |   |   |   |   |             |   |   |   |   |   |   |   |   |   |   |   |   |   |   |   |   |   |   |   |   |   |   |   |   |   |   |   |   |   |   |   |   |   |   |   |   |   |   |   |   |   |   |   |   |   |   |     |   |   |   |   |   |   |   |   |   |   |   |   |   |   |   |   |   |   |   |
| Mdlr92aJN | GA | E  | N  | ... |    |    |    |    |    |    |    |    |   |   |   |   |   |   |   |   |    |   |   |   |   |   |   |   |   |   |             |   |   |   |   |   |   |   |   |   |   |   |   |   |   |   |   |   |   |   |   |   |   |   |   |   |   |   |   |   |   |   |   |   |   |   |   |   |   |   |   |   |   |   |   |   |   |     |   |   |   |   |   |   |   |   |   |   |   |   |   |   |   |   |   |   |   |
| Dmlr92a   | GM | L  | G  | ... |    |    |    |    |    |    |    |    |   |   |   |   |   |   |   |   |    |   |   |   |   |   |   |   |   |   |             |   |   |   |   |   |   |   |   |   |   |   |   |   |   |   |   |   |   |   |   |   |   |   |   |   |   |   |   |   |   |   |   |   |   |   |   |   |   |   |   |   |   |   |   |   |   |     |   |   |   |   |   |   |   |   |   |   |   |   |   |   |   |   |   |   |   |
| Gblr76a   | G  | S  | L  | ... |    |    |    |    |    |    |    |    |   |   |   |   |   |   |   |   |    |   |   |   |   |   |   |   |   |   |             |   |   |   |   |   |   |   |   |   |   |   |   |   |   |   |   |   |   |   |   |   |   |   |   |   |   |   |   |   |   |   |   |   |   |   |   |   |   |   |   |   |   |   |   |   |   |     |   |   |   |   |   |   |   |   |   |   |   |   |   |   |   |   |   |   |   |
| Gflr76a   | R  | Q  | S  | ... |    |    |    |    |    |    |    |    |   |   |   |   |   |   |   |   |    |   |   |   |   |   |   |   |   |   |             |   |   |   |   |   |   |   |   |   |   |   |   |   |   |   |   |   |   |   |   |   |   |   |   |   |   |   |   |   |   |   |   |   |   |   |   |   |   |   |   |   |   |   |   |   |   |     |   |   |   |   |   |   |   |   |   |   |   |   |   |   |   |   |   |   |   |
| Gmm1r76a  | AL | T  | E  | ... |    |    |    |    |    |    |    |    |   |   |   |   |   |   |   |   |    |   |   |   |   |   |   |   |   |   |             |   |   |   |   |   |   |   |   |   |   |   |   |   |   |   |   |   |   |   |   |   |   |   |   |   |   |   |   |   |   |   |   |   |   |   |   |   |   |   |   |   |   |   |   |   |   |     |   |   |   |   |   |   |   |   |   |   |   |   |   |   |   |   |   |   |   |
| Galr76a   | G  | C  | L  | ... |    |    |    |    |    |    |    |    |   |   |   |   |   |   |   |   |    |   |   |   |   |   |   |   |   |   |             |   |   |   |   |   |   |   |   |   |   |   |   |   |   |   |   |   |   |   |   |   |   |   |   |   |   |   |   |   |   |   |   |   |   |   |   |   |   |   |   |   |   |   |   |   |   |     |   |   |   |   |   |   |   |   |   |   |   |   |   |   |   |   |   |   |   |
| Gpdlr76a  | G  | C  | L  | ... |    |    |    |    |    |    |    |    |   |   |   |   |   |   |   |   |    |   |   |   |   |   |   |   |   |   |             |   |   |   |   |   |   |   |   |   |   |   |   |   |   |   |   |   |   |   |   |   |   |   |   |   |   |   |   |   |   |   |   |   |   |   |   |   |   |   |   |   |   |   |   |   |   |     |   |   |   |   |   |   |   |   |   |   |   |   |   |   |   |   |   |   |   |
| Dmlr76a   | GL | V  | G  | ... |    |    |    |    |    |    |    |    |   |   |   |   |   |   |   |   |    |   |   |   |   |   |   |   |   |   |             |   |   |   |   |   |   |   |   |   |   |   |   |   |   |   |   |   |   |   |   |   |   |   |   |   |   |   |   |   |   |   |   |   |   |   |   |   |   |   |   |   |   |   |   |   |   |     |   |   |   |   |   |   |   |   |   |   |   |   |   |   |   |   |   |   |   |
| Mdlr76a2  | GL | I  | G  | ... |    |    |    |    |    |    |    |    |   |   |   |   |   |   |   |   |    |   |   |   |   |   |   |   |   |   |             |   |   |   |   |   |   |   |   |   |   |   |   |   |   |   |   |   |   |   |   |   |   |   |   |   |   |   |   |   |   |   |   |   |   |   |   |   |   |   |   |   |   |   |   |   |   |     |   |   |   |   |   |   |   |   |   |   |   |   |   |   |   |   |   |   |   |
| Mdlr76a3  | GL | M  | G  | ... |    |    |    |    |    |    |    |    |   |   |   |   |   |   |   |   |    |   |   |   |   |   |   |   |   |   |             |   |   |   |   |   |   |   |   |   |   |   |   |   |   |   |   |   |   |   |   |   |   |   |   |   |   |   |   |   |   |   |   |   |   |   |   |   |   |   |   |   |   |   |   |   |   |     |   |   |   |   |   |   |   |   |   |   |   |   |   |   |   |   |   |   |   |
| Mdlr76a1  | GM | I  | G  | ... |    |    |    |    |    |    |    |    |   |   |   |   |   |   |   |   |    |   |   |   |   |   |   |   |   |   |             |   |   |   |   |   |   |   |   |   |   |   |   |   |   |   |   |   |   |   |   |   |   |   |   |   |   |   |   |   |   |   |   |   |   |   |   |   |   |   |   |   |   |   |   |   |   |     |   |   |   |   |   |   |   |   |   |   |   |   |   |   |   |   |   |   |   |
| Aglr25a   | G  | I  | V  | ... |    |    |    |    |    |    |    |    |   |   |   |   |   |   |   |   |    |   |   |   |   |   |   |   |   |   |             |   |   |   |   |   |   |   |   |   |   |   |   |   |   |   |   |   |   |   |   |   |   |   |   |   |   |   |   |   |   |   |   |   |   |   |   |   |   |   |   |   |   |   |   |   |   |     |   |   |   |   |   |   |   |   |   |   |   |   |   |   |   |   |   |   |   |
| Dmlr25a   | G  | I  | V  | ... |    |    |    |    |    |    |    |    |   |   |   |   |   |   |   |   |    |   |   |   |   |   |   |   |   |   |             |   |   |   |   |   |   |   |   |   |   |   |   |   |   |   |   |   |   |   |   |   |   |   |   |   |   |   |   |   |   |   |   |   |   |   |   |   |   |   |   |   |   |   |   |   |   |     |   |   |   |   |   |   |   |   |   |   |   |   |   |   |   |   |   |   |   |
| Mdlr25a   | G  | I  | V  | ... |    |    |    |    |    |    |    |    |   |   |   |   |   |   |   |   |    |   |   |   |   |   |   |   |   |   |             |   |   |   |   |   |   |   |   |   |   |   |   |   |   |   |   |   |   |   |   |   |   |   |   |   |   |   |   |   |   |   |   |   |   |   |   |   |   |   |   |   |   |   |   |   |   |     |   |   |   |   |   |   |   |   |   |   |   |   |   |   |   |   |   |   |   |
| Gblr25a   | G  | I  | V  | ... |    |    |    |    |    |    |    |    |   |   |   |   |   |   |   |   |    |   |   |   |   |   |   |   |   |   |             |   |   |   |   |   |   |   |   |   |   |   |   |   |   |   |   |   |   |   |   |   |   |   |   |   |   |   |   |   |   |   |   |   |   |   |   |   |   |   |   |   |   |   |   |   |   |     |   |   |   |   |   |   |   |   |   |   |   |   |   |   |   |   |   |   |   |
| Gflr25a   | G  | V  | V  | ... |    |    |    |    |    |    |    |    |   |   |   |   |   |   |   |   |    |   |   |   |   |   |   |   |   |   |             |   |   |   |   |   |   |   |   |   |   |   |   |   |   |   |   |   |   |   |   |   |   |   |   |   |   |   |   |   |   |   |   |   |   |   |   |   |   |   |   |   |   |   |   |   |   |     |   |   |   |   |   |   |   |   |   |   |   |   |   |   |   |   |   |   |   |
| Gmm1r25a  | G  | V  | V  | ... |    |    |    |    |    |    |    |    |   |   |   |   |   |   |   |   |    |   |   |   |   |   |   |   |   |   |             |   |   |   |   |   |   |   |   |   |   |   |   |   |   |   |   |   |   |   |   |   |   |   |   |   |   |   |   |   |   |   |   |   |   |   |   |   |   |   |   |   |   |   |   |   |   |     |   |   |   |   |   |   |   |   |   |   |   |   |   |   |   |   |   |   |   |
| Galr8a    | GL | V  | G  | ... |    |    |    |    |    |    |    |    |   |   |   |   |   |   |   |   |    |   |   |   |   |   |   |   |   |   |             |   |   |   |   |   |   |   |   |   |   |   |   |   |   |   |   |   |   |   |   |   |   |   |   |   |   |   |   |   |   |   |   |   |   |   |   |   |   |   |   |   |   |   |   |   |   |     |   |   |   |   |   |   |   |   |   |   |   |   |   |   |   |   |   |   |   |
| Dmlr8a    | G  | V  | G  | ... |    |    |    |    |    |    |    |    |   |   |   |   |   |   |   |   |    |   |   |   |   |   |   |   |   |   |             |   |   |   |   |   |   |   |   |   |   |   |   |   |   |   |   |   |   |   |   |   |   |   |   |   |   |   |   |   |   |   |   |   |   |   |   |   |   |   |   |   |   |   |   |   |   |     |   |   |   |   |   |   |   |   |   |   |   |   |   |   |   |   |   |   |   |
| Mdlr8a    | GL | V  | G  | ... |    |    |    |    |    |    |    |    |   |   |   |   |   |   |   |   |    |   |   |   |   |   |   |   |   |   |             |   |   |   |   |   |   |   |   |   |   |   |   |   |   |   |   |   |   |   |   |   |   |   |   |   |   |   |   |   |   |   |   |   |   |   |   |   |   |   |   |   |   |   |   |   |   |     |   |   |   |   |   |   |   |   |   |   |   |   |   |   |   |   |   |   |   |
| Gblr8a    | G  | I  | V  | ... |    |    |    |    |    |    |    |    |   |   |   |   |   |   |   |   |    |   |   |   |   |   |   |   |   |   |             |   |   |   |   |   |   |   |   |   |   |   |   |   |   |   |   |   |   |   |   |   |   |   |   |   |   |   |   |   |   |   |   |   |   |   |   |   |   |   |   |   |   |   |   |   |   |     |   |   |   |   |   |   |   |   |   |   |   |   |   |   |   |   |   |   |   |
| Gflr8a    | G  | I  | V  | ... |    |    |    |    |    |    |    |    |   |   |   |   |   |   |   |   |    |   |   |   |   |   |   |   |   |   |             |   |   |   |   |   |   |   |   |   |   |   |   |   |   |   |   |   |   |   |   |   |   |   |   |   |   |   |   |   |   |   |   |   |   |   |   |   |   |   |   |   |   |   |   |   |   |     |   |   |   |   |   |   |   |   |   |   |   |   |   |   |   |   |   |   |   |
| Galr8a    | G  | I  | V  | ... |    |    |    |    |    |    |    |    |   |   |   |   |   |   |   |   |    |   |   |   |   |   |   |   |   |   |             |   |   |   |   |   |   |   |   |   |   |   |   |   |   |   |   |   |   |   |   |   |   |   |   |   |   |   |   |   |   |   |   |   |   |   |   |   |   |   |   |   |   |   |   |   |   |     |   |   |   |   |   |   |   |   |   |   |   |   |   |   |   |   |   |   |   |
| Gpdlr8a   | G  | I  | V  | ... |    |    |    |    |    |    |    |    |   |   |   |   |   |   |   |   |    |   |   |   |   |   |   |   |   |   |             |   |   |   |   |   |   |   |   |   |   |   |   |   |   |   |   |   |   |   |   |   |   |   |   |   |   |   |   |   |   |   |   |   |   |   |   |   |   |   |   |   |   |   |   |   |   |     |   |   |   |   |   |   |   |   |   |   |   |   |   |   |   |   |   |   |   |
| Gmm1r8a   | G  | I  | V  | ... |    |    |    |    |    |    |    |    |   |   |   |   |   |   |   |   |    |   |   |   |   |   |   |   |   |   |             |   |   |   |   |   |   |   |   |   |   |   |   |   |   |   |   |   |   |   |   |   |   |   |   |   |   |   |   |   |   |   |   |   |   |   |   |   |   |   |   |   |   |   |   |   |   |     |   |   |   |   |   |   |   |   |   |   |   |   |   |   |   |   |   |   |   |
| Gmm1r68a  | GL | I  | G  | ... |    |    |    |    |    |    |    |    |   |   |   |   |   |   |   |   |    |   |   |   |   |   |   |   |   |   |             |   |   |   |   |   |   |   |   |   |   |   |   |   |   |   |   |   |   |   |   |   |   |   |   |   |   |   |   |   |   |   |   |   |   |   |   |   |   |   |   |   |   |   |   |   |   |     |   |   |   |   |   |   |   |   |   |   |   |   |   |   |   |   |   |   |   |
| Aglr21a   | AV | V  | E  | ... |    |    |    |    |    |    |    |    |   |   |   |   |   |   |   |   |    |   |   |   |   |   |   |   |   |   |             |   |   |   |   |   |   |   |   |   |   |   |   |   |   |   |   |   |   |   |   |   |   |   |   |   |   |   |   |   |   |   |   |   |   |   |   |   |   |   |   |   |   |   |   |   |   |     |   |   |   |   |   |   |   |   |   |   |   |   |   |   |   |   |   |   |   |
| Gblr21a   | N  | L  | Q  | ... |    |    |    |    |    |    |    |    |   |   |   |   |   |   |   |   |    |   |   |   |   |   |   |   |   |   |             |   |   |   |   |   |   |   |   |   |   |   |   |   |   |   |   |   |   |   |   |   |   |   |   |   |   |   |   |   |   |   |   |   |   |   |   |   |   |   |   |   |   |   |   |   |   |     |   |   |   |   |   |   |   |   |   |   |   |   |   |   |   |   |   |   |   |
| Gflr21a   | N  | L  | Q  | ... |    |    |    |    |    |    |    |    |   |   |   |   |   |   |   |   |    |   |   |   |   |   |   |   |   |   |             |   |   |   |   |   |   |   |   |   |   |   |   |   |   |   |   |   |   |   |   |   |   |   |   |   |   |   |   |   |   |   |   |   |   |   |   |   |   |   |   |   |   |   |   |   |   |     |   |   |   |   |   |   |   |   |   |   |   |   |   |   |   |   |   |   |   |
| Galr21a   | N  | L  | Q  | ... |    |    |    |    |    |    |    |    |   |   |   |   |   |   |   |   |    |   |   |   |   |   |   |   |   |   |             |   |   |   |   |   |   |   |   |   |   |   |   |   |   |   |   |   |   |   |   |   |   |   |   |   |   |   |   |   |   |   |   |   |   |   |   |   |   |   |   |   |   |   |   |   |   |     |   |   |   |   |   |   |   |   |   |   |   |   |   |   |   |   |   |   |   |
| Gpdlr21a  | N  | L  | Q  | ... |    |    |    |    |    |    |    |    |   |   |   |   |   |   |   |   |    |   |   |   |   |   |   |   |   |   |             |   |   |   |   |   |   |   |   |   |   |   |   |   |   |   |   |   |   |   |   |   |   |   |   |   |   |   |   |   |   |   |   |   |   |   |   |   |   |   |   |   |   |   |   |   |   |     |   |   |   |   |   |   |   |   |   |   |   |   |   |   |   |   |   |   |   |
| Mdlr21a   | T  | I  | Q  | ... |    |    |    |    |    |    |    |    |   |   |   |   |   |   |   |   |    |   |   |   |   |   |   |   |   |   |             |   |   |   |   |   |   |   |   |   |   |   |   |   |   |   |   |   |   |   |   |   |   |   |   |   |   |   |   |   |   |   |   |   |   |   |   |   |   |   |   |   |   |   |   |   |   |     |   |   |   |   |   |   |   |   |   |   |   |   |   |   |   |   |   |   |   |
| Aglr76b   | G  | S  | V  | ... |    |    |    |    |    |    |    |    |   |   |   |   |   |   |   |   |    |   |   |   |   |   |   |   |   |   |             |   |   |   |   |   |   |   |   |   |   |   |   |   |   |   |   |   |   |   |   |   |   |   |   |   |   |   |   |   |   |   |   |   |   |   |   |   |   |   |   |   |   |   |   |   |   |     |   |   |   |   |   |   |   |   |   |   |   |   |   |   |   |   |   |   |   |
| Gblr76b   | N  | S  | L  | ... |    |    |    |    |    |    |    |    |   |   |   |   |   |   |   |   |    |   |   |   |   |   |   |   |   |   |             |   |   |   |   |   |   |   |   |   |   |   |   |   |   |   |   |   |   |   |   |   |   |   |   |   |   |   |   |   |   |   |   |   |   |   |   |   |   |   |   |   |   |   |   |   |   |     |   |   |   |   |   |   |   |   |   |   |   |   |   |   |   |   |   |   |   |
| Gflr76b   | N  | S  | L  | ... |    |    |    |    |    |    |    |    |   |   |   |   |   |   |   |   |    |   |   |   |   |   |   |   |   |   |             |   |   |   |   |   |   |   |   |   |   |   |   |   |   |   |   |   |   |   |   |   |   |   |   |   |   |   |   |   |   |   |   |   |   |   |   |   |   |   |   |   |   |   |   |   |   |     |   |   |   |   |   |   |   |   |   |   |   |   |   |   |   |   |   |   |   |
| Gpdlr76b  | L  | L  | N  | ... |    |    |    |    |    |    |    |    |   |   |   |   |   |   |   |   |    |   |   |   |   |   |   |   |   |   |             |   |   |   |   |   |   |   |   |   |   |   |   |   |   |   |   |   |   |   |   |   |   |   |   |   |   |   |   |   |   |   |   |   |   |   |   |   |   |   |   |   |   |   |   |   |   |     |   |   |   |   |   |   |   |   |   |   |   |   |   |   |   |   |   |   |   |
| Gmm1r76b  | N  | S  | L  | ... |    |    |    |    |    |    |    |    |   |   |   |   |   |   |   |   |    |   |   |   |   |   |   |   |   |   |             |   |   |   |   |   |   |   |   |   |   |   |   |   |   |   |   |   |   |   |   |   |   |   |   |   |   |   |   |   |   |   |   |   |   |   |   |   |   |   |   |   |   |   |   |   |   |     |   |   |   |   |   |   |   |   |   |   |   |   |   |   |   |   |   |   |   |
| Mdlr76b   | R  | S  | L  | ... |    |    |    |    |    |    |    |    |   |   |   |   |   |   |   |   |    |   |   |   |   |   |   |   |   |   |             |   |   |   |   |   |   |   |   |   |   |   |   |   |   |   |   |   |   |   |   |   |   |   |   |   |   |   |   |   |   |   |   |   |   |   |   |   |   |   |   |   |   |   |   |   |   |     |   |   |   |   |   |   |   |   |   |   |   |   |   |   |   |   |   |   |   |
| Galr76b   | D  | F  | D  | ... |    |    |    |    |    |    |    |    |   |   |   |   |   |   |   |   |    |   |   |   |   |   |   |   |   |   |             |   |   |   |   |   |   |   |   |   |   |   |   |   |   |   |   |   |   |   |   |   |   |   |   |   |   |   |   |   |   |   |   |   |   |   |   |   |   |   |   |   |   |   |   |   |   |     |   |   |   |   |   |   |   |   |   |   |   |   |   |   |   |   |   |   |   |
| Aglr93a   | E  | I  | F  | ... |    |    |    |    |    |    |    |    |   |   |   |   |   |   |   |   |    |   |   |   |   |   |   |   |   |   |             |   |   |   |   |   |   |   |   |   |   |   |   |   |   |   |   |   |   |   |   |   |   |   |   |   |   |   |   |   |   |   |   |   |   |   |   |   |   |   |   |   |   |   |   |   |   |     |   |   |   |   |   |   |   |   |   |   |   |   |   |   |   |   |   |   |   |
| Dmlr93a   | G  | S  | L  | ... |    |    |    |    |    |    |    |    |   |   |   |   |   |   |   |   |    |   |   |   |   |   |   |   |   |   |             |   |   |   |   |   |   |   |   |   |   |   |   |   |   |   |   |   |   |   |   |   |   |   |   |   |   |   |   |   |   |   |   |   |   |   |   |   |   |   |   |   |   |   |   |   |   |     |   |   |   |   |   |   |   |   |   |   |   |   |   |   |   |   |   |   |   |
| Mdlr93a   | G  | S  | L  | ... |    |    |    |    |    |    |    |    |   |   |   |   |   |   |   |   |    |   |   |   |   |   |   |   |   |   |             |   |   |   |   |   |   |   |   |   |   |   |   |   |   |   |   |   |   |   |   |   |   |   |   |   |   |   |   |   |   |   |   |   |   |   |   |   |   |   |   |   |   |   |   |   |   |     |   |   |   |   |   |   |   |   |   |   |   |   |   |   |   |   |   |   |   |
| Gblr93a   | K  | I  | I  | ... |    |    |    |    |    |    |    |    |   |   |   |   |   |   |   |   |    |   |   |   |   |   |   |   |   |   |             |   |   |   |   |   |   |   |   |   |   |   |   |   |   |   |   |   |   |   |   |   |   |   |   |   |   |   |   |   |   |   |   |   |   |   |   |   |   |   |   |   |   |   |   |   |   |     |   |   |   |   |   |   |   |   |   |   |   |   |   |   |   |   |   |   |   |
| Gpdlr93a  | G  | A  | L  | ... |    |    |    |    |    |    |    |    |   |   |   |   |   |   |   |   |    |   |   |   |   |   |   |   |   |   |             |   |   |   |   |   |   |   |   |   |   |   |   |   |   |   |   |   |   |   |   |   |   |   |   |   |   |   |   |   |   |   |   |   |   |   |   |   |   |   |   |   |   |   |   |   |   |     |   |   |   |   |   |   |   |   |   |   |   |   |   |   |   |   |   |   |   |

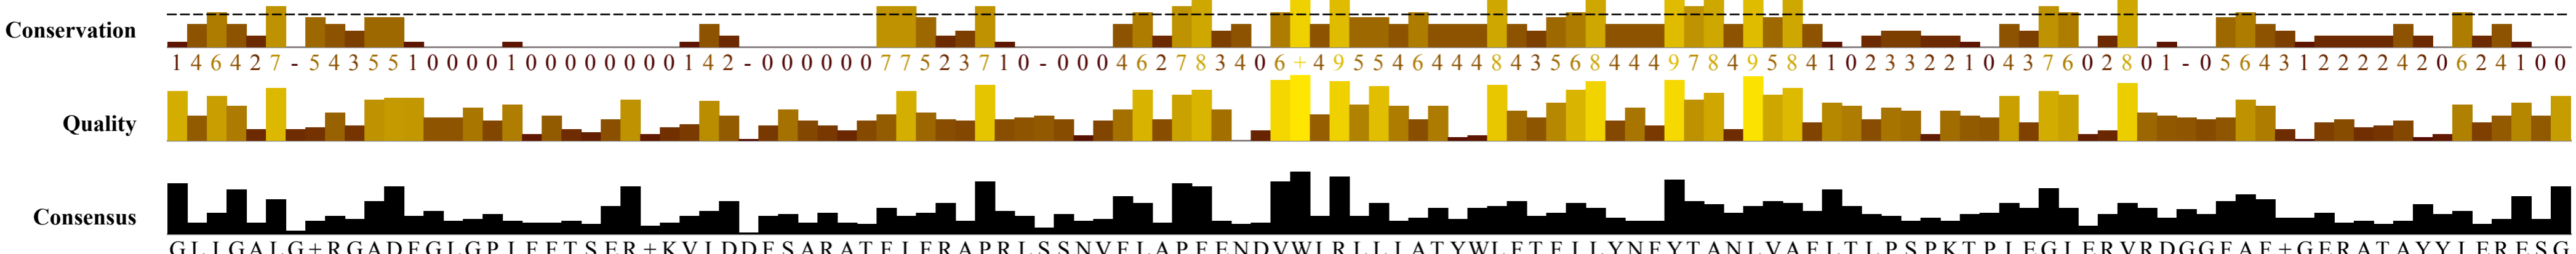

Supplement: pntd.0004421.s005.pdf [file pntd.0004421.s005.pdf]
