# Supplementary material for: Genome-Wide Comparative Analysis of Chemosensory Gene Families in Five Tsetse Fly Species
Source: PLoS Negl Trop Dis. 2016 Feb 17;10(2):e0004421. doi: 10.1371/journal.pntd.0004421 (PMC4757090; doi:10.1371/journal.pntd.0004421)

|            | R* |   |   |   |   |   |   |   |   |   | R* |   |   |   |   |   |   |   |   |   | R* |   |   |   |   |   |   |   |   |   | S/T* |   |   |   |   |   |   |   |   |   | D and/or E* |   |   |   |   |   |   |   |   |   |   |   |   |   |   |   |   |   |   |   |   |   |   |   |   |   |   |   |   |   |   |   |   |   |   |   |   |   |   |   |   |   |   |   |   |   |   |   |   |   |   |   |   |   |   |   |   |   |   |   |   |   |   |   |   |   |   |   |   |   |   |   |   |   |   |   |   |   |   |   |   |   |   |   |   |   |   |   |   |   |   |   |   |   |   |   |   |   |   |   |   |   |   |   |   |   |   |   |   |   |   |   |   |   |   |   |   |   |   |   |   |   |   |   |   |   |   |   |   |   |   |   |   |   |   |   |   |   |   |   |   |   |   |   |   |   |   |   |   |   |   |   |   |   |   |   |   |   |   |   |   |   |   |   |   |   |   |   |   |   |   |   |   |   |   |   |   |   |   |   |   |   |   |   |   |   |   |   |   |   |   |   |   |   |   |   |   |   |   |   |   |   |   |   |   |   |   |   |   |   |   |   |   |   |   |   |   |   |   |   |   |   |   |   |   |   |   |   |   |   |   |   |   |   |   |   |   |   |   |   |   |   |   |   |   |   |   |   |   |   |   |   |   |   |   |   |   |   |   |   |   |   |   |   |   |   |   |   |   |   |   |   |   |   |
|------------|----|---|---|---|---|---|---|---|---|---|----|---|---|---|---|---|---|---|---|---|----|---|---|---|---|---|---|---|---|---|------|---|---|---|---|---|---|---|---|---|-------------|---|---|---|---|---|---|---|---|---|---|---|---|---|---|---|---|---|---|---|---|---|---|---|---|---|---|---|---|---|---|---|---|---|---|---|---|---|---|---|---|---|---|---|---|---|---|---|---|---|---|---|---|---|---|---|---|---|---|---|---|---|---|---|---|---|---|---|---|---|---|---|---|---|---|---|---|---|---|---|---|---|---|---|---|---|---|---|---|---|---|---|---|---|---|---|---|---|---|---|---|---|---|---|---|---|---|---|---|---|---|---|---|---|---|---|---|---|---|---|---|---|---|---|---|---|---|---|---|---|---|---|---|---|---|---|---|---|---|---|---|---|---|---|---|---|---|---|---|---|---|---|---|---|---|---|---|---|---|---|---|---|---|---|---|---|---|---|---|---|---|---|---|---|---|---|---|---|---|---|---|---|---|---|---|---|---|---|---|---|---|---|---|---|---|---|---|---|---|---|---|---|---|---|---|---|---|---|---|---|---|---|---|---|---|---|---|---|---|---|---|---|---|---|---|---|---|---|---|---|---|---|---|---|---|---|---|---|---|---|---|---|---|---|---|---|---|---|---|---|---|---|---|---|---|---|---|---|---|---|---|---|---|---|---|---|---|---|---|---|---|---|---|---|
| GpdItr56b  | L  | S | E | S | E | D | . | . | W | K | L  | S | V | D | . | . | D | L | N | K | N  | K | G | T | L | S | G | G | K | L | F    | F | N | A | C | Y | S | . | K | I | L           | L | D | V | S | Q | S | Y | T | M | N | S | . | P | A | S | Y | P | R | R | H | F | T | L | Q | S | . | . | . | . | E | R | L | S | L | S | S | Q | I | L | Y | L | H | T | N | Y | M | R | S | L | P | D | S | Q | T | A | D | I | I | Y | L | F | Y | R | M | D | S | H | D | R | . | Q | T | D | W | N | F | Q | L | L | S | I | C | I | G | S | V | F | Y | H | Q | Y | Q | I | H | W | N | F | E | K |   |   |   |   |   |   |   |   |   |   |   |   |   |   |   |   |   |   |   |   |   |   |   |   |   |   |   |   |   |   |   |   |   |   |   |   |   |   |   |   |   |   |   |   |   |   |   |   |   |   |   |   |   |   |   |   |   |   |   |   |   |   |   |   |   |   |   |   |   |   |   |   |   |   |   |   |   |   |   |   |   |   |   |   |   |   |   |   |   |   |   |   |   |   |   |   |   |   |   |   |   |   |   |   |   |   |   |   |   |   |   |   |   |   |   |   |   |   |   |   |   |   |   |   |   |   |   |   |   |   |   |   |   |   |   |   |   |   |   |   |   |   |   |   |   |   |   |   |   |   |   |   |   |   |   |   |   |   |   |   |   |   |   |   |   |   |   |   |   |   |   |   |   |   |
| AgNMDAR3   | A  | H | N | S | R | A | A | G | G | A | G  | V | G | L | R | G | R | . | M | F | R  | E | D | H | L | D | R | G | L | K | L    | I | D | G | P | A | A | P | T | G | V           | I | G | D | L | I | D | P | L | S | S | A | R | S | E | D | F | T | A | P | L | A | P | F | S | E | W | L | S | P | G | S | K | . | S | S | A | A | F | A | K | P | K | S | W | N | K | L | L | F | H | N | E | Y | E | M | V | G | . | A | A | N | R | L | Q | S | . | E | G | E | R | D | T | P | L | D | Y | T | D | C | Y | I | D | S | Y | A | F | P | L | K | S | H | D | T | A | K | W | . | E | . |   |   |   |   |   |   |   |   |   |   |   |   |   |   |   |   |   |   |   |   |   |   |   |   |   |   |   |   |   |   |   |   |   |   |   |   |   |   |   |   |   |   |   |   |   |   |   |   |   |   |   |   |   |   |   |   |   |   |   |   |   |   |   |   |   |   |   |   |   |   |   |   |   |   |   |   |   |   |   |   |   |   |   |   |   |   |   |   |   |   |   |   |   |   |   |   |   |   |   |   |   |   |   |   |   |   |   |   |   |   |   |   |   |   |   |   |   |   |   |   |   |   |   |   |   |   |   |   |   |   |   |   |   |   |   |   |   |   |   |   |   |   |   |   |   |   |   |   |   |   |   |   |   |   |   |   |   |   |   |   |   |   |   |   |   |   |   |   |   |   |   |   |   |   |
| AgNMDAR2   | S  | T | S | . | Y | N | S | C | G | S | G  | R | S | N | K | D | L | . | K | I | N  | K | P | K | F | T | S | S | G | I | D    | L | L | E | G | F | E | D | G | E | G           | L | I | A | D | L | V | D | S | L | M | N | E | R | E | A | D | F | S | K | R | . | A | P | F | D | A | W | L | S | P | G | N | G | T | P | S | F | T | H | V | D | S | P | R | G | F | T | S | R | R | E | E | F | H | E | G | N | D | F | G | T | H | T | Y | E | R | S | S | V | D | G | T | A | D | G | T | L | D | Y | Q | D | C | Y | A | T | G | Y | G | S | K | Y | V | R | A | N | R | R | Y | W | M | . | E | S |   |   |   |   |   |   |   |   |   |   |   |   |   |   |   |   |   |   |   |   |   |   |   |   |   |   |   |   |   |   |   |   |   |   |   |   |   |   |   |   |   |   |   |   |   |   |   |   |   |   |   |   |   |   |   |   |   |   |   |   |   |   |   |   |   |   |   |   |   |   |   |   |   |   |   |   |   |   |   |   |   |   |   |   |   |   |   |   |   |   |   |   |   |   |   |   |   |   |   |   |   |   |   |   |   |   |   |   |   |   |   |   |   |   |   |   |   |   |   |   |   |   |   |   |   |   |   |   |   |   |   |   |   |   |   |   |   |   |   |   |   |   |   |   |   |   |   |   |   |   |   |   |   |   |   |   |   |   |   |   |   |   |   |   |   |   |   |   |   |   |
| DmNmdar2   | S  | T | S | Q | . | Y | T | S | C | G | N  | G | R | G | N | K | D | L | . | K | I  | N | K | P | K | F | T | S | S | G | I    | D | L | L | E | G | F | E | D | G | E           | G | L | I | A | D | L | V | D | S | L | M | N | E | R | E | A | D | F | S | K | R | . | A | P | F | D | A | W | L | S | P | G | N | T | T | P | S | F | T | H | V | D | S | P | R | G | F | T | S | R | R | E | E | F | H | E | G | N | D | F | G | T | H | T | Y | V | K | T | S | V | D | G | A | A | D | G | T | L | D | Y | Q | D | C | Y | A | T | G | Y | G | S | K | Y | V | R | A | N | R | R | Y | W | M | . | E | S |   |   |   |   |   |   |   |   |   |   |   |   |   |   |   |   |   |   |   |   |   |   |   |   |   |   |   |   |   |   |   |   |   |   |   |   |   |   |   |   |   |   |   |   |   |   |   |   |   |   |   |   |   |   |   |   |   |   |   |   |   |   |   |   |   |   |   |   |   |   |   |   |   |   |   |   |   |   |   |   |   |   |   |   |   |   |   |   |   |   |   |   |   |   |   |   |   |   |   |   |   |   |   |   |   |   |   |   |   |   |   |   |   |   |   |   |   |   |   |   |   |   |   |   |   |   |   |   |   |   |   |   |   |   |   |   |   |   |   |   |   |   |   |   |   |   |   |   |   |   |   |   |   |   |   |   |   |   |   |   |   |   |   |   |   |   |   |   |   |
| GffnNMDAR2 | S  | T | S | Q | . | Y | S | S | C | G | N  | G | R | G | N | K | D | L | . | K | I  | N | K | P | K | F | T | S | S | G | I    | D | L | L | E | G | F | E | D | G | E           | G | L | I | A | D | L | V | D | S | L | M | N | E | R | E | A | D | F | S | K | R | . | A | P | F | D | A | W | L | S | P | G | N | T | T | P | S | F | T | H | V | D | S | P | R | G | F | T | S | R | R | E | E | F | H | E | G | N | D | F | G | T | H | T | Y | E | K | S | S | V | D | G | A | D | D | G | T | L | D | Y | Q | D | C | Y | A | T | G | Y | G | S | K | Y | V | R | A | N | R | R | Y | W | M | . | E | S |   |   |   |   |   |   |   |   |   |   |   |   |   |   |   |   |   |   |   |   |   |   |   |   |   |   |   |   |   |   |   |   |   |   |   |   |   |   |   |   |   |   |   |   |   |   |   |   |   |   |   |   |   |   |   |   |   |   |   |   |   |   |   |   |   |   |   |   |   |   |   |   |   |   |   |   |   |   |   |   |   |   |   |   |   |   |   |   |   |   |   |   |   |   |   |   |   |   |   |   |   |   |   |   |   |   |   |   |   |   |   |   |   |   |   |   |   |   |   |   |   |   |   |   |   |   |   |   |   |   |   |   |   |   |   |   |   |   |   |   |   |   |   |   |   |   |   |   |   |   |   |   |   |   |   |   |   |   |   |   |   |   |   |   |   |   |   |   |   |
| GmmNMDAR2  | S  | T | S | Q | . | Y | S | S | C | G | N  | G | R | G | N | K | D | L | . | K | I  | N | K | P | K | F | T | S | S | G | I    | D | L | L | E | G | F | E | D | G | E           | G | L | I | A | D | L | V | D | S | L | M | N | E | R | E | A | D | F | S | K | R | . | A | P | F | D | A | W | L | S | P | G | N | T | T | P | S | F | T | H | V | D | S | P | R | G | F | T | S | R | R | E | E | F | H | E | G | N | D | F | G | T | H | T | Y | E | K | S | S | V | D | G | A | D | D | G | T | L | D | Y | Q | D | C | Y | A | T | G | Y | G | S | K | Y | V | R | A | N | R | R | Y | W | M | . | E | S |   |   |   |   |   |   |   |   |   |   |   |   |   |   |   |   |   |   |   |   |   |   |   |   |   |   |   |   |   |   |   |   |   |   |   |   |   |   |   |   |   |   |   |   |   |   |   |   |   |   |   |   |   |   |   |   |   |   |   |   |   |   |   |   |   |   |   |   |   |   |   |   |   |   |   |   |   |   |   |   |   |   |   |   |   |   |   |   |   |   |   |   |   |   |   |   |   |   |   |   |   |   |   |   |   |   |   |   |   |   |   |   |   |   |   |   |   |   |   |   |   |   |   |   |   |   |   |   |   |   |   |   |   |   |   |   |   |   |   |   |   |   |   |   |   |   |   |   |   |   |   |   |   |   |   |   |   |   |   |   |   |   |   |   |   |   |   |   |   |
| GpdNMDAR2  | S  | T | S | Q | . | Y | S | S | C | G | N  | G | R | G | N | K | D | L | . | K | I  | N | K | P | K | F | T | S | S | G | I    | D | L | L | E | G | F | E | D | G | E           | G | L | I | A | D | L | V | D | S | L | M | N | E | R | E | A | D | F | S | K | R | . | A | P | F | D | A | W | L | S | P | G | N | T | T | P | S | F | T | H | V | D | S | P | R | G | F | T | S | R | R | E | E | F | H | E | G | N | D | F | G | T | H | T | Y | E | K | S | S | V | D | G | A | D | D | G | T | L | D | Y | Q | D | C | Y | A | T | G | Y | G | S | K | Y | V | R | A | N | R | R | Y | W | M | . | E | S |   |   |   |   |   |   |   |   |   |   |   |   |   |   |   |   |   |   |   |   |   |   |   |   |   |   |   |   |   |   |   |   |   |   |   |   |   |   |   |   |   |   |   |   |   |   |   |   |   |   |   |   |   |   |   |   |   |   |   |   |   |   |   |   |   |   |   |   |   |   |   |   |   |   |   |   |   |   |   |   |   |   |   |   |   |   |   |   |   |   |   |   |   |   |   |   |   |   |   |   |   |   |   |   |   |   |   |   |   |   |   |   |   |   |   |   |   |   |   |   |   |   |   |   |   |   |   |   |   |   |   |   |   |   |   |   |   |   |   |   |   |   |   |   |   |   |   |   |   |   |   |   |   |   |   |   |   |   |   |   |   |   |   |   |   |   |   |   |   |
| AgNMDAR1   | E  | H | S | S | K | D | S | D | C | G | S  | G | K | G | E | T | D | R | . | D | V  | V | K | M | P | T | L | R | K | G | I    | D | L | L | R | N | F | P | D | G | V           | G | L | I | G | E | L | V | D | P | L | T | N | E | R | A | E | E | F | S | K | K | L | S | P | F | S | T | R | F | S | P | G | T | D | E | N | S | A | G | E | T | P | R | S | F | S | A | R | E | R | P | K | T | K | G | N | D | C | A | . | S | V | Q | N | Y | D | T | A | Q | A | Q | D | D | S | S | L | E | Y | K | D | C | F | G | S | G | Y | G | S | P | W | T | H | E | S | D | K | E | W | I | . | E | K |   |   |   |   |   |   |   |   |   |   |   |   |   |   |   |   |   |   |   |   |   |   |   |   |   |   |   |   |   |   |   |   |   |   |   |   |   |   |   |   |   |   |   |   |   |   |   |   |   |   |   |   |   |   |   |   |   |   |   |   |   |   |   |   |   |   |   |   |   |   |   |   |   |   |   |   |   |   |   |   |   |   |   |   |   |   |   |   |   |   |   |   |   |   |   |   |   |   |   |   |   |   |   |   |   |   |   |   |   |   |   |   |   |   |   |   |   |   |   |   |   |   |   |   |   |   |   |   |   |   |   |   |   |   |   |   |   |   |   |   |   |   |   |   |   |   |   |   |   |   |   |   |   |   |   |   |   |   |   |   |   |   |   |   |   |   |   |   |   |   |   |
| DmNmdar1   | E  | H | S | S | R | D | S | D | C | A | S  | G | K | G | E | T | D | R | . | D | V  | H | V | M | P | T | L | R | R | G | I    | D | L | L | R | N | F | P | D | G | L           | G | L | I | G | E | L | V | D | P | L | T | N | E | R | A | E | E | F | S | K | K | L | S | P | F | S | T | R | F | S | P | G | S | D | E | N | S | A | G | E | T | P | R | S | F | S | A | R | E | R | P | K | T | K | G | N | D | C | A | . | S | V | Q | N | Y | A | T | A | Q | A | Q | D | D | S | S | L | E | Y | K | D | C | F | G | S | G | Y | G | S | P | W | T | H | E | S | D | K | Q | W | I | . | H | E | K |   |   |   |   |   |   |   |   |   |   |   |   |   |   |   |   |   |   |   |   |   |   |   |   |   |   |   |   |   |   |   |   |   |   |   |   |   |   |   |   |   |   |   |   |   |   |   |   |   |   |   |   |   |   |   |   |   |   |   |   |   |   |   |   |   |   |   |   |   |   |   |   |   |   |   |   |   |   |   |   |   |   |   |   |   |   |   |   |   |   |   |   |   |   |   |   |   |   |   |   |   |   |   |   |   |   |   |   |   |   |   |   |   |   |   |   |   |   |   |   |   |   |   |   |   |   |   |   |   |   |   |   |   |   |   |   |   |   |   |   |   |   |   |   |   |   |   |   |   |   |   |   |   |   |   |   |   |   |   |   |   |   |   |   |   |   |   |   |   |   |
| GffnNMDAR1 | E  | H | S | S | R | D | S | N | C | G | S  | G | K | G | E | T | D | R | . | D | V  | L | P | M | P | T | L | R | R | G | I    | D | L | L | R | N | F | P | D | G | P           | G | L | I | G | E | L | V | D | P | L | T | N | E | R | A | E | E | F | S | K | K | L | S | P | F | S | T | R | F | S | P | G | A | D | E | N | S | A | G | E | T | P | R | S | F | S | A | R | E | R | P | K | T | K | G | N | D | C | A | . | S | V | Q | N | Y | D | T | A | Q | A | E | D | D | S | S | L | E | Y | K | D | C | F | G | S | G | Y | G | S | P | W | T | H | E | S | D | K | A | W | I | . | E | K |   |   |   |   |   |   |   |   |   |   |   |   |   |   |   |   |   |   |   |   |   |   |   |   |   |   |   |   |   |   |   |   |   |   |   |   |   |   |   |   |   |   |   |   |   |   |   |   |   |   |   |   |   |   |   |   |   |   |   |   |   |   |   |   |   |   |   |   |   |   |   |   |   |   |   |   |   |   |   |   |   |   |   |   |   |   |   |   |   |   |   |   |   |   |   |   |   |   |   |   |   |   |   |   |   |   |   |   |   |   |   |   |   |   |   |   |   |   |   |   |   |   |   |   |   |   |   |   |   |   |   |   |   |   |   |   |   |   |   |   |   |   |   |   |   |   |   |   |   |   |   |   |   |   |   |   |   |   |   |   |   |   |   |   |   |   |   |   |   |   |   |
| GmmNMDAR1  | E  | H | S | S | R | D | S | N | C | G | S  | G | K | G | E | T | D | R | . | D | V  | L | P | M | P | T | L | R | R | G | I    | D | L | L | R | N | F | P | D | G | P           | G | L | I | G | E | L | V | D | P | L | T | N | E | R | A | E | E | F | S | K | K | L | S | P | F | S | T | R | F | S | P | G | A | D | E | N | S | A | G | E | T | P | R | S | F | S | A | R | E | R | P | K | T | K | G | N | D | C | A | . | S | V | Q | N | Y | D | T | A | Q | A | E | D | D | S | S | L | E | Y | K | D | C | F | G | S | G | Y | G | S | P | W | T | H | E | S | D | K | A | W | I | . | E | K |   |   |   |   |   |   |   |   |   |   |   |   |   |   |   |   |   |   |   |   |   |   |   |   |   |   |   |   |   |   |   |   |   |   |   |   |   |   |   |   |   |   |   |   |   |   |   |   |   |   |   |   |   |   |   |   |   |   |   |   |   |   |   |   |   |   |   |   |   |   |   |   |   |   |   |   |   |   |   |   |   |   |   |   |   |   |   |   |   |   |   |   |   |   |   |   |   |   |   |   |   |   |   |   |   |   |   |   |   |   |   |   |   |   |   |   |   |   |   |   |   |   |   |   |   |   |   |   |   |   |   |   |   |   |   |   |   |   |   |   |   |   |   |   |   |   |   |   |   |   |   |   |   |   |   |   |   |   |   |   |   |   |   |   |   |   |   |   |   |   |   |
| GpdNMDAR1  | E  | H | S | S | R | D | S | N | C | G | S  | G | K | G | E | T | D | R | . | D | V  | L | P | M | P | T | L | R | R | G | I    | D | L | L | R | N | F | P | D | G | P           | G | L | I | G | E | L | V | D | P | L | T | N | E | R | A | E | E | F | S | K | K | L | S | P | F | S | T | R | F | S | P | G | A | D | E | N | S | A | G | E | T | P | R | S | F | S | A | R | E | R | P | K | T | K | G | N | D | C | A | . | S | V | Q | N | Y | D | T | A | Q | A | E | D | D | S | S | L | E | Y | K | D | C | F | G | S | G | Y | G | S | P | W | T | H | E | S | D | K | A | W | I | . | E | K |   |   |   |   |   |   |   |   |   |   |   |   |   |   |   |   |   |   |   |   |   |   |   |   |   |   |   |   |   |   |   |   |   |   |   |   |   |   |   |   |   |   |   |   |   |   |   |   |   |   |   |   |   |   |   |   |   |   |   |   |   |   |   |   |   |   |   |   |   |   |   |   |   |   |   |   |   |   |   |   |   |   |   |   |   |   |   |   |   |   |   |   |   |   |   |   |   |   |   |   |   |   |   |   |   |   |   |   |   |   |   |   |   |   |   |   |   |   |   |   |   |   |   |   |   |   |   |   |   |   |   |   |   |   |   |   |   |   |   |   |   |   |   |   |   |   |   |   |   |   |   |   |   |   |   |   |   |   |   |   |   |   |   |   |   |   |   |   |   |   |   |
| GaNMDAR1   | E  | H | S | S | R | D | S | N | C | G | S  | G | K | G | E | T | D | R | . | D | V  | L | P | M | P | T | L | R | R | G | I    | D | L | L | R | N | F | P | D | G | P           | G | L | I | G | E | L | V | D | P | L | T | N | E | R | A | E | E | F | S | K | K | L | S | P | F | S | T | . | S | H | E | . | . | . | . | N | S | A | G | E | T | P | R | S | F | S | A | R | E | R | P | K | T | K | G | N | D | C | A | . | S | V | Q | N | Y | D | T | A | Q | A | E | D | D | S | S | L | E | Y | K | D | C | F | G | S | G | Y | G | S | P | W | T | H | E | S | D | K | A | W | I | . | E | K |   |   |   |   |   |   |   |   |   |   |   |   |   |   |   |   |   |   |   |   |   |   |   |   |   |   |   |   |   |   |   |   |   |   |   |   |   |   |   |   |   |   |   |   |   |   |   |   |   |   |   |   |   |   |   |   |   |   |   |   |   |   |   |   |   |   |   |   |   |   |   |   |   |   |   |   |   |   |   |   |   |   |   |   |   |   |   |   |   |   |   |   |   |   |   |   |   |   |   |   |   |   |   |   |   |   |   |   |   |   |   |   |   |   |   |   |   |   |   |   |   |   |   |   |   |   |   |   |   |   |   |   |   |   |   |   |   |   |   |   |   |   |   |   |   |   |   |   |   |   |   |   |   |   |   |   |   |   |   |   |   |   |   |   |   |   |   |   |   |   |   |
| AgGLUR1    | D  | Y | D | S | Y | D | E | D | C | K | H  | G | R | G | L | T | K | R | . | H | V  | V | K | R | K | T | T | R | E | G | K    | D | L | A | K | G | I | K | D | G | V           | G | M | V | G | E | L | V | D | P | M | T | T | E | R | E | R | D | F | S | K | R | V | S | P | L | S | E | R | F | S | P | E | K | S | L | S | . | S | L | S | D | I | . | S | P | R | S | I | S | G | R | E | R | M | V | T | P | S | E | D | Y | G | T | . | S | T | S | R | V | K | S | Y | E | G | R | R | E | S | P | N | E | Y | R | E | C | L | D | K | G | F | G | S | P | L | R | K | E | N | V | N | K | W | . | E | . |   |   |   |   |   |   |   |   |   |   |   |   |   |   |   |   |   |   |   |   |   |   |   |   |   |   |   |   |   |   |   |   |   |   |   |   |   |   |   |   |   |   |   |   |   |   |   |   |   |   |   |   |   |   |   |   |   |   |   |   |   |   |   |   |   |   |   |   |   |   |   |   |   |   |   |   |   |   |   |   |   |   |   |   |   |   |   |   |   |   |   |   |   |   |   |   |   |   |   |   |   |   |   |   |   |   |   |   |   |   |   |   |   |   |   |   |   |   |   |   |   |   |   |   |   |   |   |   |   |   |   |   |   |   |   |   |   |   |   |   |   |   |   |   |   |   |   |   |   |   |   |   |   |   |   |   |   |   |   |   |   |   |   |   |   |   |   |   |
| DmGluRIa   | D  | Y | D | S | Y | D | E | D | C | K | Q  | R | G | L | S | R | . | H | V | Q | R  | H | T | S | K | E | G | K | D | L | A    | K | G | I | Q | D | G | A | G | M | V           | G | E | L | I | D | A | M | T | T | E | R | E | R | D | F | S | K | V | S | P | L | S | E | R | F | P | P | E | P | P | I | G | T | L | S | D | I | . | T | P | P | S | I | A | G | R | E | R | M | V | A | P | T | E | D | Y | G | T | . | S | T | S | K | V | H | T | Y | E | G | R | R | E | S | P | N | E | Y | R | P | C | I | D | K | G | F | G | S | P | L | R | K | E | N | R | N | K | W | . | E | G |   |   |   |   |   |   |   |   |   |   |   |   |   |   |   |   |   |   |   |   |   |   |   |   |   |   |   |   |   |   |   |   |   |   |   |   |   |   |   |   |   |   |   |   |   |   |   |   |   |   |   |   |   |   |   |   |   |   |   |   |   |   |   |   |   |   |   |   |   |   |   |   |   |   |   |   |   |   |   |   |   |   |   |   |   |   |   |   |   |   |   |   |   |   |   |   |   |   |   |   |   |   |   |   |   |   |   |   |   |   |   |   |   |   |   |   |   |   |   |   |   |   |   |   |   |   |   |   |   |   |   |   |   |   |   |   |   |   |   |   |   |   |   |   |   |   |   |   |   |   |   |   |   |   |   |   |   |   |   |   |   |   |   |   |   |   |   |   |   |   |   |   |   |
| GpdGluRIb  | .  | Y | E | E | F | V | . | C | . | I | G  | N | . | . | R | . | H | V | R | . | .  | . | K | K | G | I | . | . | . | . | .    | . | . | . | . | . | . | . | . | . | .           | . | . | . | . | . | . | . | . | . | . | . | . | . | . | . | . | . | . | . | . | . | . | . | . | . | . | . | . | . | . | . | . | . | . | . | . | . | . | . | . | . | . | . | . | . | . | . | . | . | . | . | . | . | . | . | . | . | . | . | . | . | . | . | . | . | . | . | . | . | . | . | . | . | . | . | . | . | . | . | . | . | . | . | . | . | . | . | . | . | . | . | . | . | . | . | . | . | . | . | . | . | . | . | . | . | . | . | . | . | . | . | . | . | . | . | . | . | . | . | . | . | . | . | . | . | . | . | . | . | . | . | . | . | . | . | . | . | . | . | . | . | . | . | . | . | . | . | . | . | . | . | . | . | . | . | . | . | . | . | . | . | . | . | . | . | . | . | . | . | . | . | . | . | . | . | . | . | . | . | . | . | . | . | . | . | . | . | . | . | . | . | . | . | . | . | . | . | . | . | . | . | . | . | . | . | . | . | . | . | . | . | . | . | . | . | . | . | . | . | . | . | . | . | . | . | . | . | . | . | . | . | . | . | . | . | . | . | . | . | . | . | . | . | . | . | . | . | . | . | . | . | . | . | . | . | . | . | . | . | . | . | . | . | . | . | . | . | . | . | . | . | . | . |

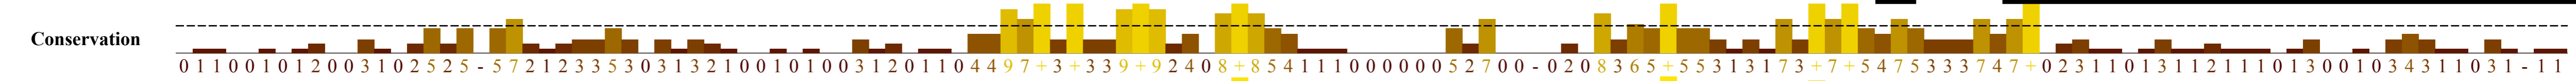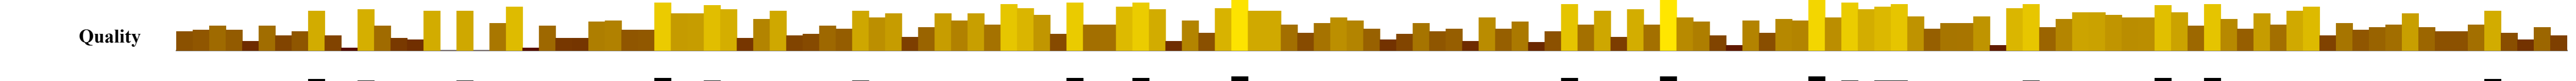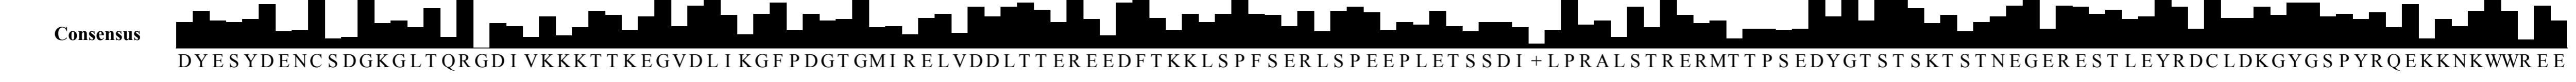

Supplement: S4 Fig — (PDF) [file pntd.0004421.s006.pdf]
