# Supplementary material for: Genome-Wide Comparative Analysis of Chemosensory Gene Families in Five Tsetse Fly Species
Source: PubMed Central journal article supplement (PMC4757090; doi:10.1371/journal.pntd.0004421), 2016-02-17
Supplement: pntd.0004421.s003.pdf [file pntd.0004421.s003.pdf]

**(A): - OBP83a homologs**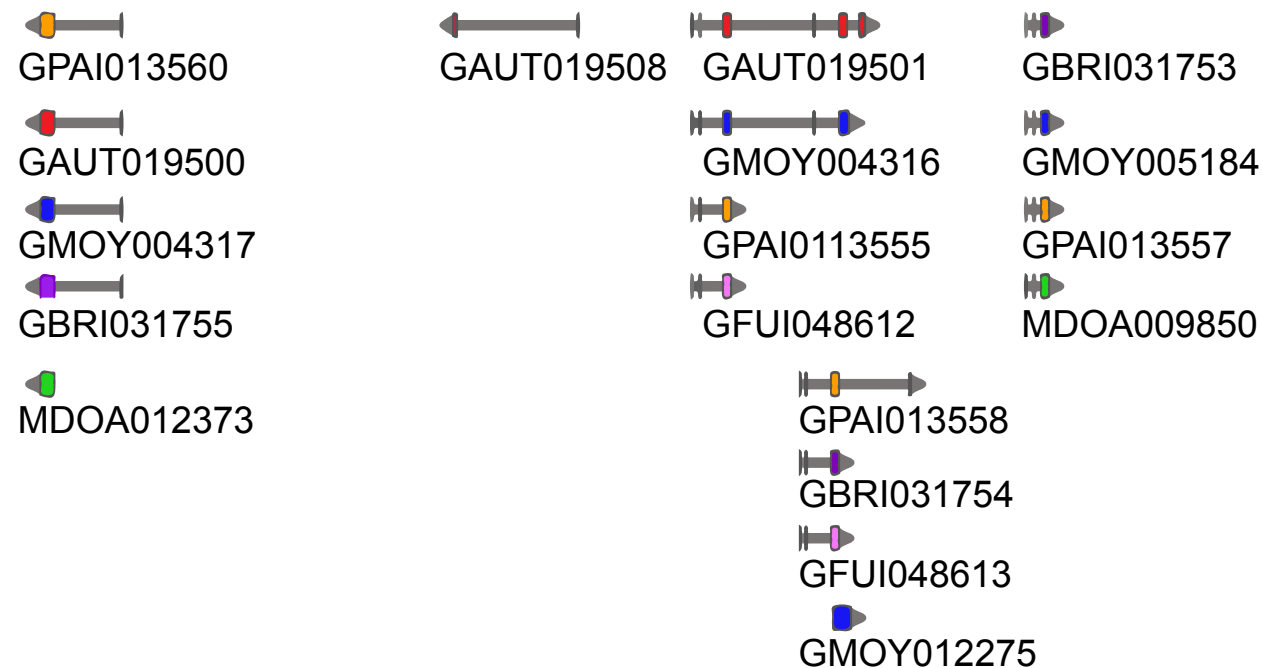**(B): - OR7a homologs**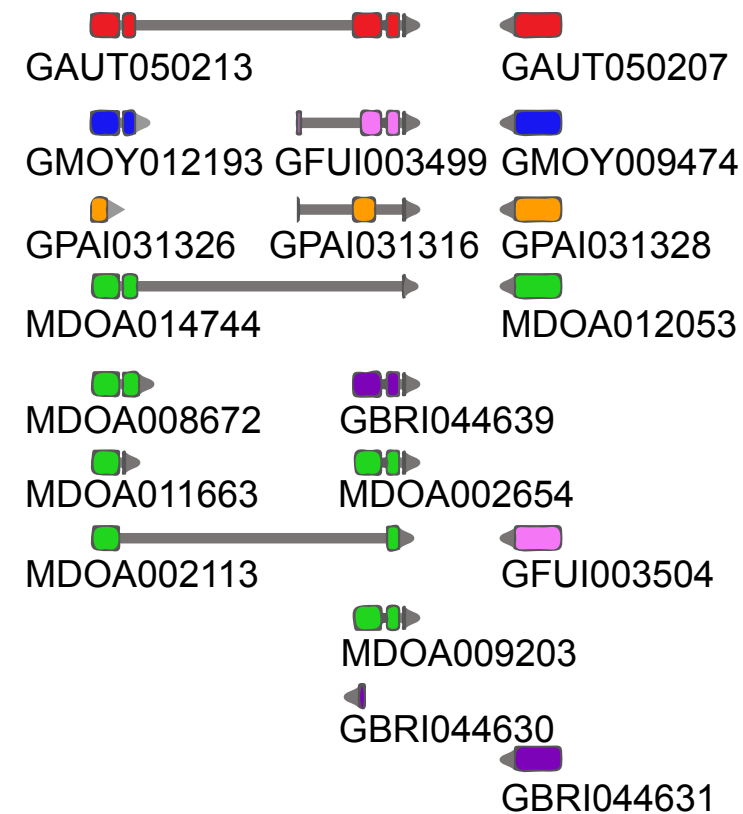**(C): - OR56a homologs**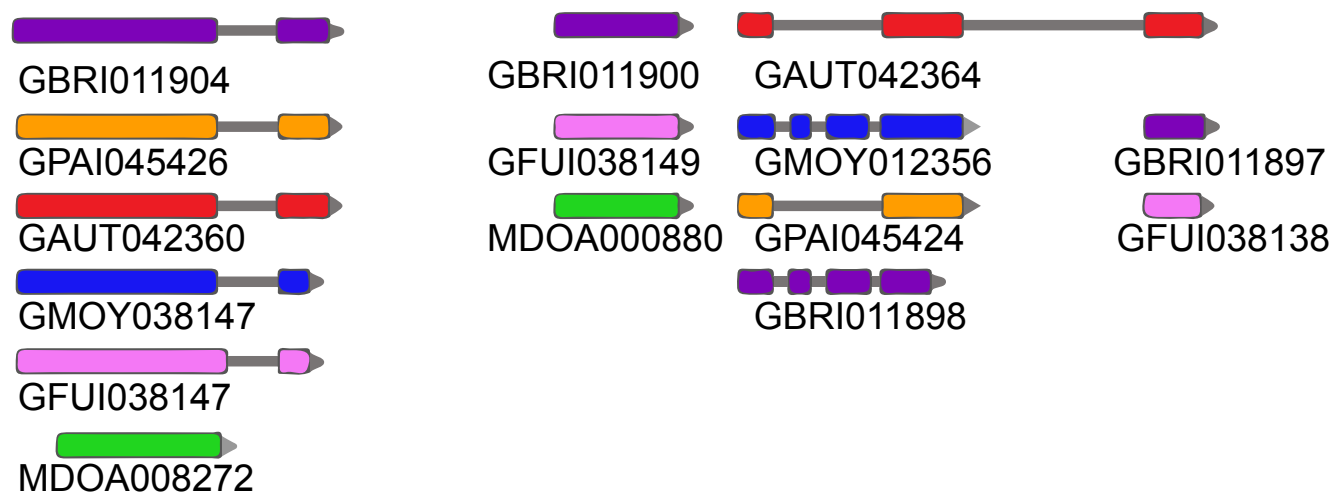**KEY**

- █ *G. austeni*
- █ *G. brevipalpis*
- █ *G. m. morsitans*
- █ *G. f. fuscipes*
- █ *G. pallidipes*
- █ *M. domestica*
