# Supplementary material for: Genome-Wide Comparative Analysis of Chemosensory Gene Families in Five Tsetse Fly Species
Source: PubMed Central journal article supplement (PMC4757090; doi:10.1371/journal.pntd.0004421), 2016-02-17

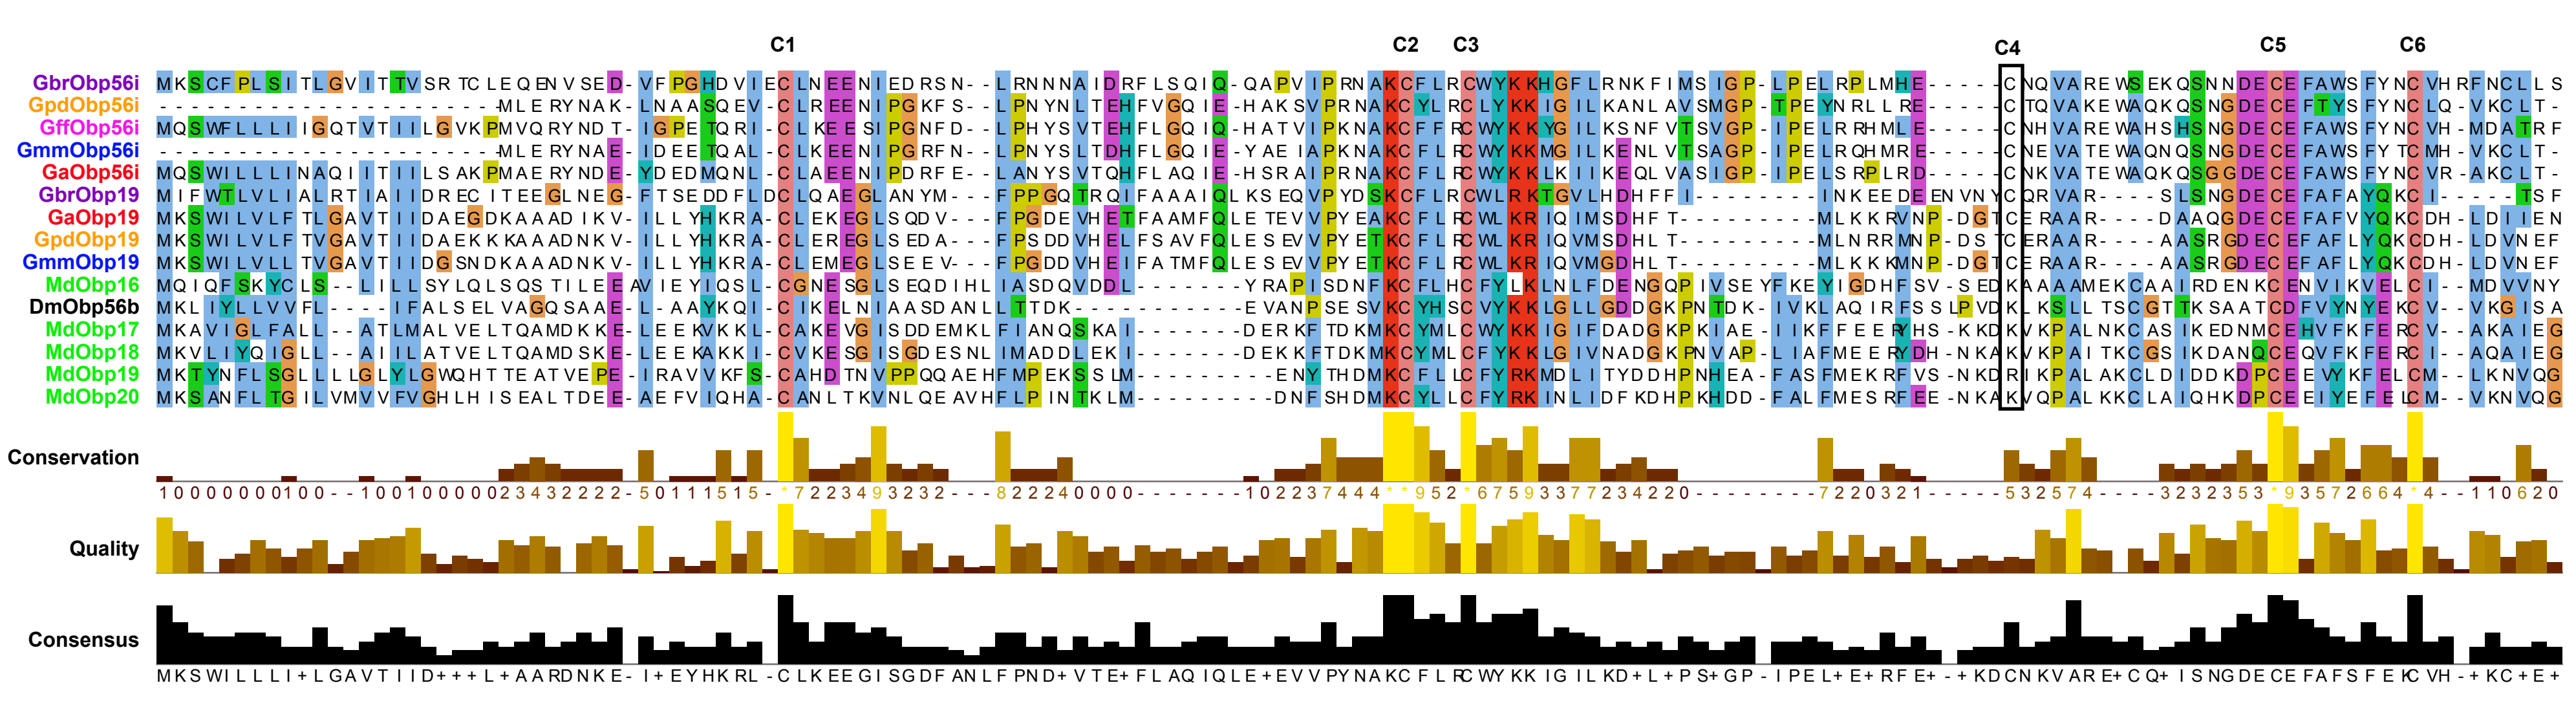

Supplement: pntd.0004421.s004.pdf [file pntd.0004421.s004.pdf]
