# Supplementary material for: Genome-Wide Comparative Analysis of Chemosensory Gene Families in Five Tsetse Fly Species
Source: PubMed Central journal article supplement (PMC4757090; doi:10.1371/journal.pntd.0004421), 2016-02-17
Supplement: pntd.0004421.s007.pdf [file pntd.0004421.s007.pdf]

| Gene Id | ln M8        | ln M8a       | $\Delta$ ln (M8-M8a) | $\Delta$ LRT | p-value     | w1M8    |
|---------|--------------|--------------|----------------------|--------------|-------------|---------|
| A10p    | -811.159168  | -817.800546  | 6.641378             | 13.282756    | 0.000267858 | 2.29248 |
| CSP1    | -382.682564  | -385.27889   | 2.596326             | 5.192652     | 0.02268258  | 0.0001  |
| ejbp3A  | -696.258521  | -696.304455  | 0.045934             | 0.091868     | 0.761815678 | 1.68715 |
| ejbp3B  | -518.928289  | -523.260899  | 4.33261              | 8.66522      | 0.003243409 | 0.59149 |
| GluRIA  | -1779.752613 | -1786.335007 | 6.582394             | 13.164788    | 0.000285259 | 1.7262  |
| GluRIB  | -674.078481  | -674.078482  | 1E-06                | 2E-06        | 0.998871621 | 1.70965 |
| GluRIIA | -1387.04268  | -1391.213979 | 4.171299             | 8.342598     | 0.003872618 | 1.42643 |
| GluRIIC | -2667.323657 | -2671.053334 | 3.729677             | 7.459354     | 0.006310766 | 2.72147 |
| GluRIIE | -3028.805848 | -3028.093265 | -0.712583            | -1.425166    | -           | 1.57715 |
| Gr21a1  | -1591.535275 | -1605.840088 | 14.304813            | 28.609626    | 8.85409E-08 | 1.30195 |
| Gr21a2  | -2064.268263 | -2080.9993   | 16.731037            | 33.462074    | 7.26673E-09 | 1.01281 |
| Gr21a3  | -1270.762992 | -1282.246557 | 11.483565            | 22.96713     | 1.64795E-06 | 1.24483 |
| Gr28B   | -1526.110898 | -1533.825774 | 7.714876             | 15.429752    | 8.56295E-05 | 1.36457 |
| Gr28C   | -1589.121628 | -1598.749933 | 9.628305             | 19.25661     | 1.14274E-05 | 2.13749 |
| Gr33a   | -1261.766144 | -1262.140791 | 0.374647             | 0.749294     | 0.386699848 | 1.68448 |
| Gr58c   | -1507.540911 | -1514.059466 | 6.518555             | 13.03711     | 0.000305379 | 2.10371 |
| Gr59f1  | -1815.566077 | -1815.791053 | 0.224976             | 0.449952     | 0.502357751 | 1.82731 |
| Gr59f2  | -2010.700595 | -2011.986454 | 1.285859             | 2.571718     | 0.108789555 | 1.83603 |
| Gr63a   | -1444.402808 | -1455.818486 | 11.415678            | 22.831356    | 1.76857E-06 | 1.83256 |
| Gr66a   | -1183.440173 | -1187.896531 | 4.456358             | 8.912716     | 0.002831918 | 2.05806 |
| ir10a   | -2392.593054 | -2396.646383 | 4.053329             | 8.106658     | 0.004410297 | 1.37199 |
| ir21a   | -2199.702085 | -2208.512353 | 8.810268             | 17.620536    | 2.69661E-05 | 1.15853 |
| ir25    | -3264.733748 | -3275.303169 | 10.569421            | 21.138842    | 4.27181E-06 | 1.50841 |
| ir31a   | -2508.134615 | -2521.610983 | 13.476368            | 26.952736    | 2.08492E-07 | 1.55333 |
| ir40a   | -3421.099018 | -3431.515305 | 10.416287            | 20.832574    | 5.01232E-06 | 1.88823 |
| ir56b   | -1496.79393  | -1502.338468 | 5.544538             | 11.089076    | 0.000868377 | 1.86781 |
| ir64a   | -916.914224  | -923.116909  | 6.202685             | 12.40537     | 0.000428101 | 1.31106 |
| ir68a   | -2046.262936 | -2054.194127 | 7.931191             | 15.862382    | 6.81194E-05 | 2.02104 |
| ir75a   | -104.160337  | -106.330077  | 2.16974              | 4.33948      | 0.037238302 | 2.01713 |
| ir75d   | -1212.436183 | -1217.669923 | 5.23374              | 10.46748     | 0.001214943 | 2.00941 |
| ir76a   | -1037.475269 | -1040.520959 | 3.04569              | 6.09138      | 0.013584296 | 1.33976 |
| ir76b   | -1963.879283 | -1981.541563 | 17.66228             | 35.32456     | 2.7909E-09  | 1.95194 |
| ir84a   | -2557.239819 | -2562.557501 | 5.317682             | 10.635364    | 0.001109454 | 1.72142 |
| KaiR2c  | -2017.042121 | -2028.777698 | 11.735577            | 23.471154    | 1.26801E-06 | 1.57074 |
| KaiR2d  | -2530.319767 | -2536.90377  | 6.584003             | 13.168006    | 0.00028477  | 1.60019 |
| KaiR2e  | -4564.736913 | -4617.805034 | 53.068121            | 106.136242   | 6.88361E-25 | 1.67408 |
| NMDAR1  | -1433.452954 | -1443.795972 | 10.343018            | 20.686036    | 5.41092E-06 | 1.32275 |
| NMDAR2  | -1525.774413 | -1525.774787 | 0.000374             | 0.000748     | 0.978180906 | 999     |

| Gene Id | ln M8        | ln M8a       | $\Delta\ln(\text{M8-M8a})$ | $\Delta\text{LRT}$ | p-value     | w1M8    |
|---------|--------------|--------------|----------------------------|--------------------|-------------|---------|
| Obp19c  | -592.597893  | -594.309115  | 1.711222                   | 3.422444           | 0.064315745 | 1.83436 |
| Obp19d  | -436.845096  | -439.06433   | 2.219234                   | 4.438468           | 0.03513777  | 1.00041 |
| Obp28a  | -191.907338  | -196.96203   | 5.054692                   | 10.109384          | 0.001475163 | 0.76343 |
| Obp56d  | -1065.703464 | -1066.119903 | 0.416439                   | 0.832878           | 0.361441647 | 2.09463 |
| Obp56e2 | -602.066258  | -603.426361  | 1.360103                   | 2.720206           | 0.099085258 | 1.74658 |
| Obp56h  | -722.263364  | -724.565057  | 2.301693                   | 4.603386           | 0.03190888  | 1.38401 |
| Obp57c  | -510.380555  | -511.77078   | 1.390225                   | 2.78045            | 0.09542138  | 1.28414 |
| Obp69a  | -361.75084   | -361.750075  | -0.000765                  | -0.00153           |             | 1.80803 |
| Obp83a1 | -969.07813   | -970.491354  | 1.413224                   | 2.826448           | 0.092723254 | 1.21639 |
| Obp83a2 | -489.760434  | -498.019898  | 8.259464                   | 16.518928          | 4.81668E-05 | 0.54851 |
| Obp83a3 | -322.039075  | -327.242169  | 5.203094                   | 10.406188          | 0.001255937 | 0.69415 |
| Obp83a4 | -335.818905  | -336.829961  | 1.011056                   | 2.022112           | 0.155023445 | 1.84241 |
| Obp83cd | -1233.336032 | -1234.506778 | 1.170746                   | 2.341492           | 0.12596889  | 1.48651 |
| Obp83ef | -1027.819822 | -1029.299338 | 1.479516                   | 2.959032           | 0.08539908  | 1.71375 |
| Obp83g  | -677.0205    | -682.371204  | 5.350704                   | 10.701408          | 0.00107054  | 1.7544  |
| Obp84a  | -479.832141  | -479.832141  | 0                          | 0                  | 1           | 1.63039 |
| Obp8a   | -529.980427  | -532.186649  | 2.206222                   | 4.412444           | 0.035677697 | 1.31538 |
| Obp99b  | -618.505767  | -620.759341  | 2.253574                   | 4.507148           | 0.033753482 | 1.90399 |
| Obp99c  | -554.783115  | -559.879799  | 5.096684                   | 10.193368          | 0.001409467 | 0.36278 |
| Obp99d  | -917.796276  | -918.187654  | 0.391378                   | 0.782756           | 0.376299582 | 1.38129 |
| or13a   | -1612.489811 | -1619.172167 | 6.682356                   | 13.364712          | 0.000256403 | 1.4792  |
| or19b   | -1610.528045 | -1613.28506  | 2.757015                   | 5.51403            | 0.018864533 | 1.93225 |
| or24a   | -1921.263337 | -1921.686614 | 0.423277                   | 0.846554           | 0.35752903  | 1.99768 |
| or2a    | -2470.057777 | -2476.275713 | 6.217936                   | 12.435872          | 0.000421166 | 2.0718  |
| or42b   | -958.367761  | -968.196179  | 9.828418                   | 19.656836          | 9.26712E-06 | 1.0048  |
| or43a1  | -1163.982537 | -1166.254384 | 2.271847                   | 4.543694           | 0.033040222 | 2.41268 |
| or43a2  | -1088.231672 | -1088.231672 | 0                          | 0                  | 1           | 1.8918  |
| or45a1  | -1762.777159 | -1763.196956 | 0.419797                   | 0.839594           | 0.359512916 | 1.73313 |
| or45a2  | -1109.761898 | -1124.325497 | 14.563599                  | 29.127198          | 6.77788E-08 | 0.95888 |
| or45a3  | -1866.857618 | -1872.732158 | 5.87454                    | 11.74908           | 0.000608733 | 1.35203 |
| or46a1  | -2398.70866  | -2403.760216 | 5.051556                   | 10.103112          | 0.001480192 | 1.46483 |
| or46a   | -2458.908629 | -2462.717437 | 3.808808                   | 7.617616           | 0.005780085 | 1.48063 |
| or47b   | -1487.100413 | -1488.556496 | 1.456083                   | 2.912166           | 0.087913748 | 1.57852 |
| or49b   | -796.40015   | -799.609305  | 3.209155                   | 6.41831            | 0.011294961 | 0.75688 |
| or56a   | -232.568085  | -232.568085  | 0                          | 0                  | 1           | 1.83446 |
| or59a   | -1749.879123 | -1757.103331 | 7.224208                   | 14.448416          | 0.000144051 | 1.80968 |
| or63a   | -525.829913  | -525.829913  | 0                          | 0                  | 1           | 2.62606 |
| or67a   | -1373.083959 | -1379.531518 | 6.447559                   | 12.895118          | 0.00032944  | 0.87018 |

| <b>Gene Id</b> | <b>ln M8 (L1)</b> | <b>ln M8a (Ln1)</b> | <b><math>\Delta\ln(\text{M8-M8a})</math></b> | <b><math>\Delta\text{LRT}</math></b> | <b>p-value</b> | <b>w1M8</b> |
|----------------|-------------------|---------------------|----------------------------------------------|--------------------------------------|----------------|-------------|
| or67d5         | -1952.938323      | -1961.108488        | 8.170165                                     | 16.34033                             | 5.29255E-05    | 1.51376     |
| or67d6         | -1543.942602      | -1547.266569        | 3.323967                                     | 6.647934                             | 0.009927087    | 1.24351     |
| or67d2         | -1069.648332      | -1069.648332        | 0                                            | 0                                    | 1              | 1.23977     |
| or7a1          | -2608.22251       | -2622.52591         | 14.3034                                      | 28.6068                              | 8.86703E-08    | 1.51628     |
| or7a2          | -2425.510498      | -2425.573017        | 0.062519                                     | 0.125038                             | 0.723633334    | 1.01809     |
| or82a          | -1523.492611      | -1535.596667        | 12.104056                                    | 24.208112                            | 8.64673E-07    | 1.43647     |
| or85b          | -1561.679373      | -1565.079367        | 3.399994                                     | 6.799988                             | 0.009115849    | 1.3         |
| or85d          | -1894.523481      | -1896.810886        | 2.287405                                     | 4.57481                              | 0.032445348    | 1.52842     |
| or85e          | -2015.021557      | -2019.404637        | 4.38308                                      | 8.76616                              | 0.003068709    | 1.31723     |
| or88a          | -1277.767544      | -1283.397827        | 5.630283                                     | 11.260566                            | 0.000791711    | 1.13272     |
| Orco           | -608.602208       | -616.587685         | 7.985477                                     | 15.970954                            | 6.43218E-05    | 0.93643     |
| PhekIII        | -539.535291       | -539.976337         | 0.441046                                     | 0.882092                             | 0.347629342    | 1.81391     |
| snmp1          | -860.156544       | -876.02422          | 15.867676                                    | 31.735352                            | 1.76677E-08    | 0.76972     |
| snmp2          | -824.334696       | -826.228048         | 1.893352                                     | 3.786704                             | 0.051661294    | 3.56878     |
