# Supplementary material for: Genome-Wide Comparative Analysis of Chemosensory Gene Families in Five Tsetse Fly Species
Source: PubMed Central journal article supplement (PMC4757090; doi:10.1371/journal.pntd.0004421), 2016-02-17
Supplement: pntd.0004421.s008.pdf [file pntd.0004421.s008.pdf]

| <b>Gene id</b> | <b>Singleton (S)<br/>or<br/>Duplicate (D)</b> | <b>Number of<br/>Codons<br/><br/>Analysed</b> | <b><math>\Delta</math>LRT = <math>2 \times (\ln L1 - \ln L0)</math></b> | <b>P-value estimated by<br/>PARRIS<br/><br/>at p&lt;0.05</b> | <b>Number of Sites by<br/>MEME at p&lt;0.05</b> |
|----------------|-----------------------------------------------|-----------------------------------------------|-------------------------------------------------------------------------|--------------------------------------------------------------|-------------------------------------------------|
| Gr21a          | D                                             | 621                                           | 21.8705                                                                 | 0                                                            | 39                                              |
| Gr28b          | D                                             | 569                                           | 6.97557                                                                 | 0.000867529                                                  | 41                                              |
| Gr59f          | D                                             | 669                                           | 27.0006                                                                 | 0                                                            | 39                                              |
| Obp19a         | S                                             | 203                                           | 6.98971                                                                 | 0.0303513                                                    | 6                                               |
| Obp56e         | D                                             | 273                                           | 7.4433                                                                  | 0.0237864                                                    | 11                                              |
| Obp56i         | S                                             | 367                                           | 6.41513                                                                 | 0.0404517                                                    | 6                                               |
| Obp57c         | S                                             | 199                                           | 9.91644                                                                 | 0.00702317                                                   | 1                                               |
| Obp69a         | S                                             | 178                                           | 7.34839                                                                 | 0.0253618                                                    | 2                                               |
| Obp83a         | D                                             | 498                                           | 57.9273                                                                 | 2.63789E-13                                                  | 29                                              |
| Or45a          | D                                             | 601                                           | 13.3874                                                                 | 0                                                            | 47                                              |
| Or67d          | D                                             | 606                                           | 40.9955                                                                 | 0                                                            | 131                                             |
| GluRIIA        | S                                             | 1807                                          | 12.5879                                                                 | 0.0177759                                                    | 2                                               |
